# Supplementary material for: Molecular iodine-catalysed oxidative CO–C(alkyl) bond cleavage of aryl/heteroaryl alkyl ketones: an efficient strategy to access fused polyheterocycles
Source: Royal Society of Chemistry journal article supplement (doi:10.1039/c8nj03417f), 2018-01-01
Supplement: c8nj03417f1.pdf [file c8nj03417f1.pdf]

## Supporting information

### **Molecular iodine-catalysed oxidative CO-C(alkyl) bond cleavage of aryl/heteroaryl alkyl ketones: An efficient strategy to access fused polyheterocycles**

Geeta Sai Mani,<sup>a</sup> Ayanampudi Venkata Subba Rao,<sup>b</sup> Yellaiah Tangella,<sup>b</sup> Satish sunkari,<sup>b</sup>  
Faria Sultana,<sup>b</sup> Hari Krishna Namballa,<sup>a</sup> Nagula Shankaraiah<sup>a,\*</sup> and Ahmed Kamal<sup>\*a,b,c</sup>

#### **List of contents**

|                                                                                                             |             |
|-------------------------------------------------------------------------------------------------------------|-------------|
| <sup>1</sup> H and <sup>13</sup> C NMR spectra of compounds <b>4a-t</b> , <b>6a-j</b> and <b>8a-d</b> ..... | <b>2-35</b> |
|-------------------------------------------------------------------------------------------------------------|-------------|

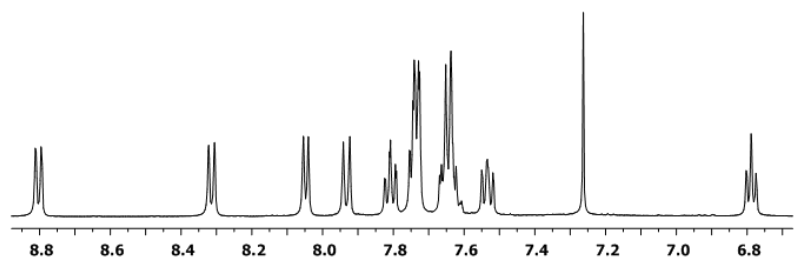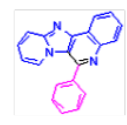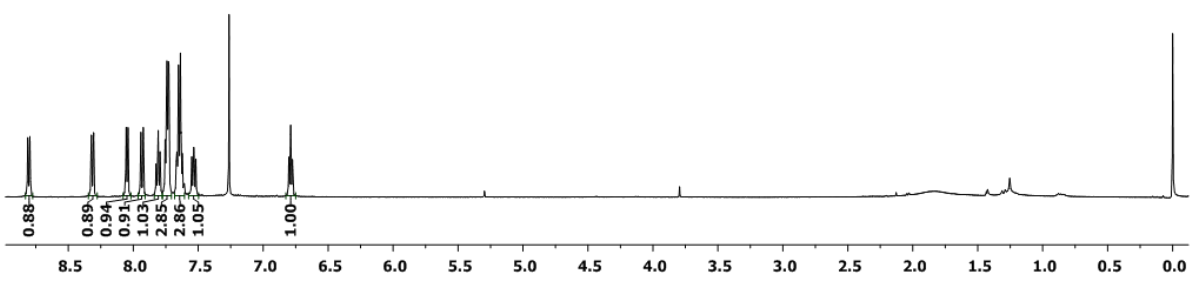

<sup>1</sup>H NMR spectrum of compound 4a

- 149.71
- 148.25
- 147.43
- 145.05
- 138.35
- 129.97
- 129.65
- 129.62
- 129.34
- 128.94
- 128.74
- 126.61
- 122.67
- 119.89

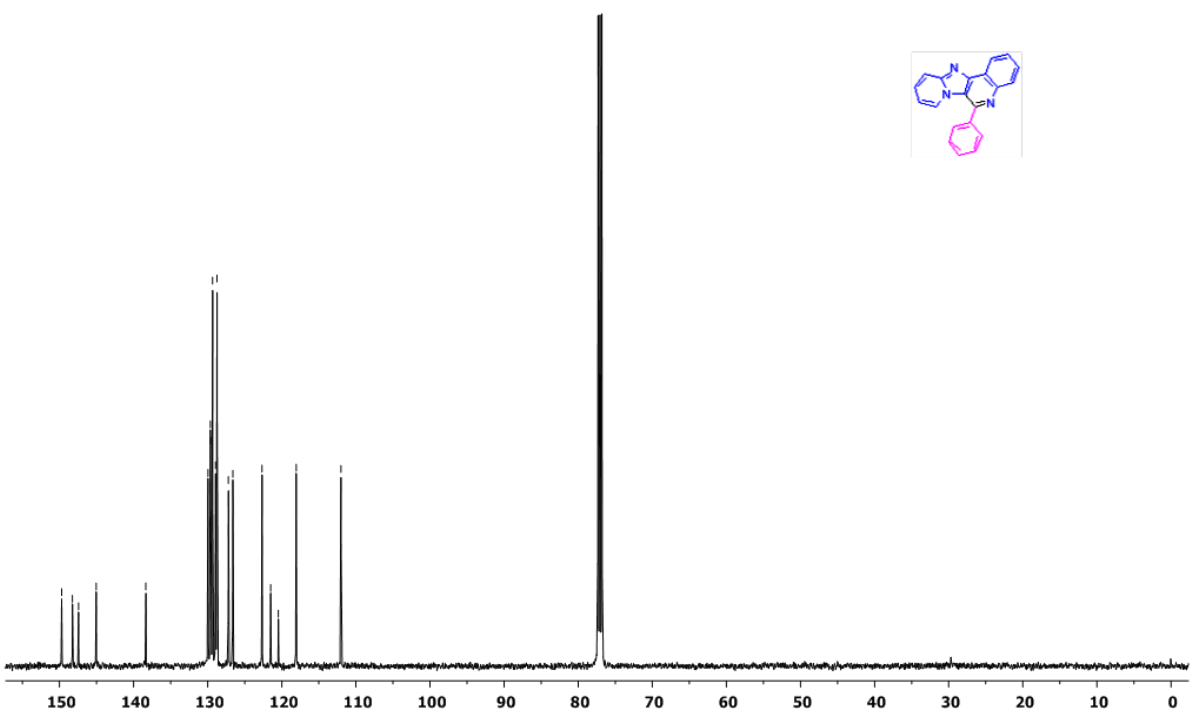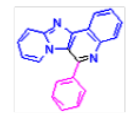

<sup>13</sup>C NMR spectrum of compound 4a

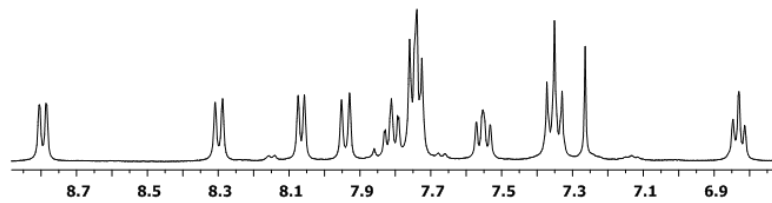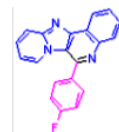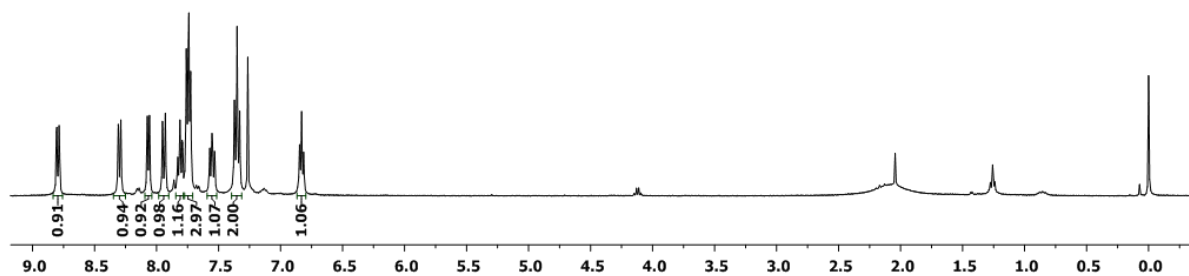

<sup>1</sup>H NMR spectrum of compound 4b

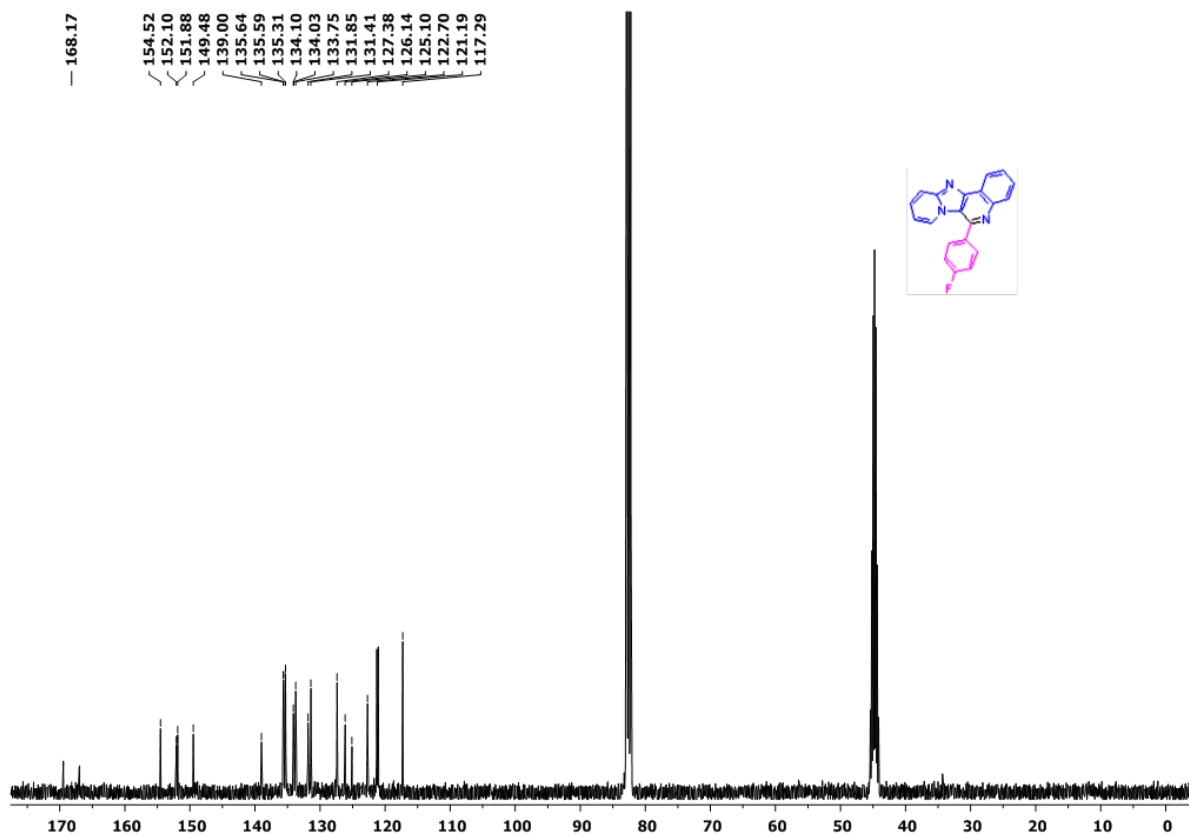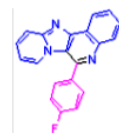

<sup>13</sup>C NMR spectrum of compound 4b

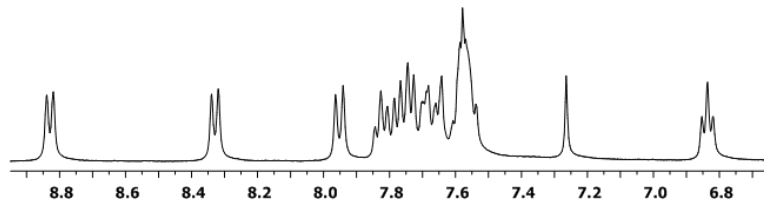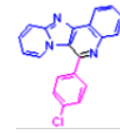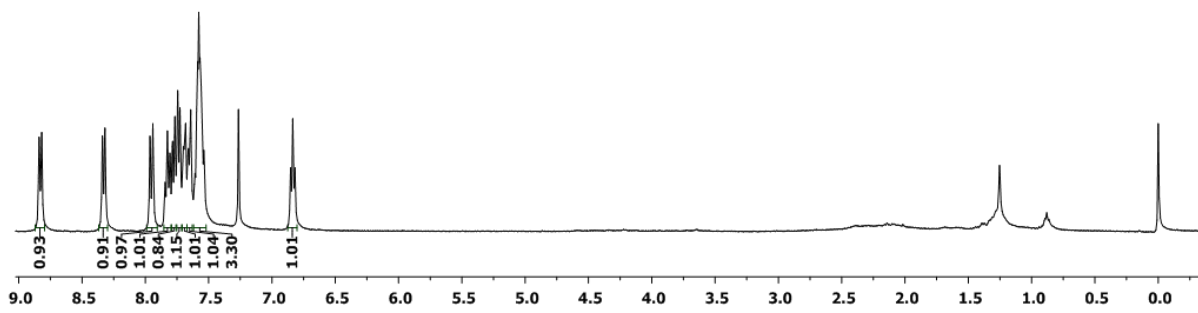

$^1\text{H}$  NMR spectrum of compound **4c**

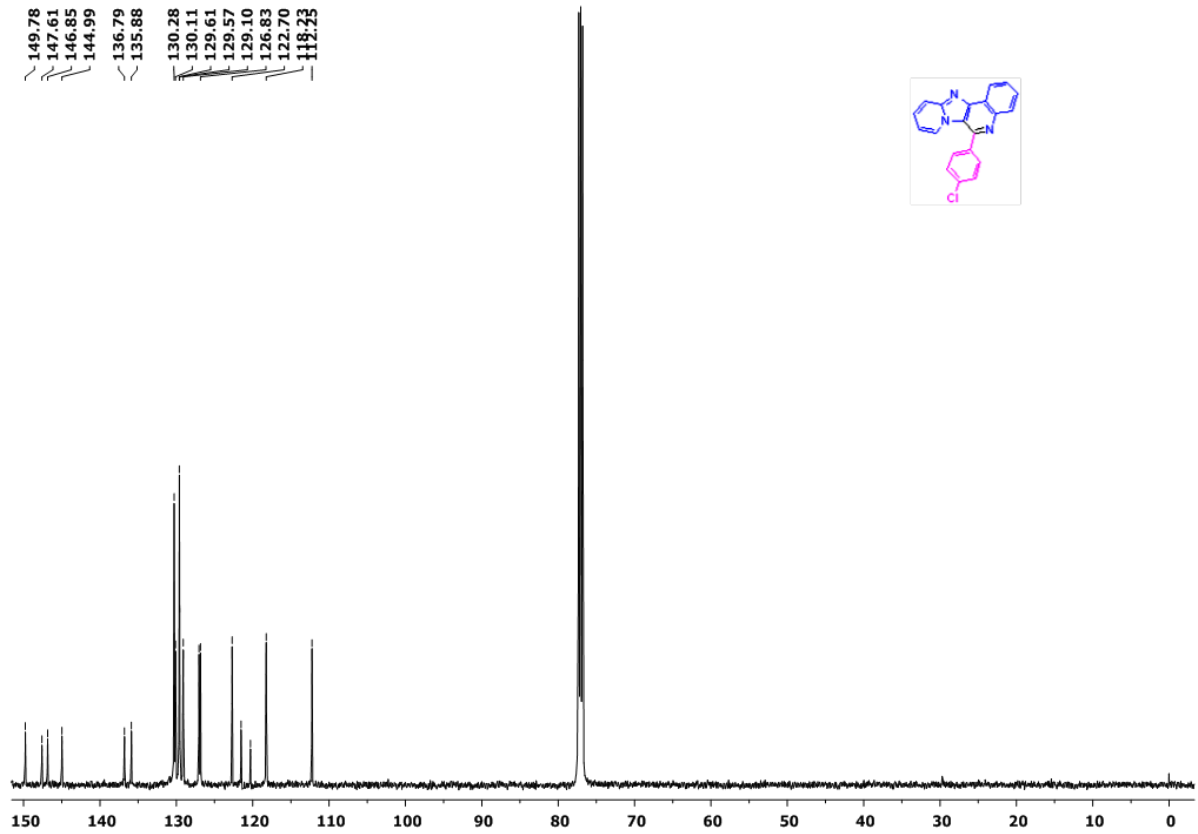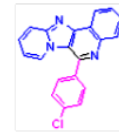

$^{13}\text{C}$  NMR spectrum of compound **4c**

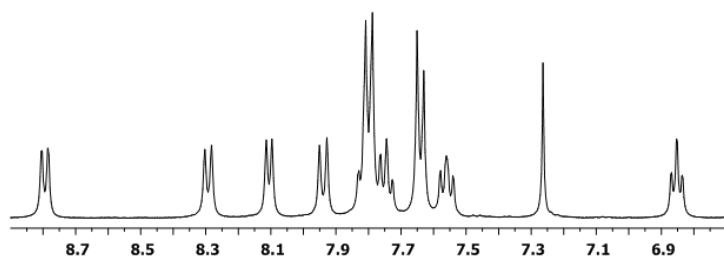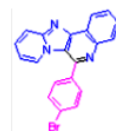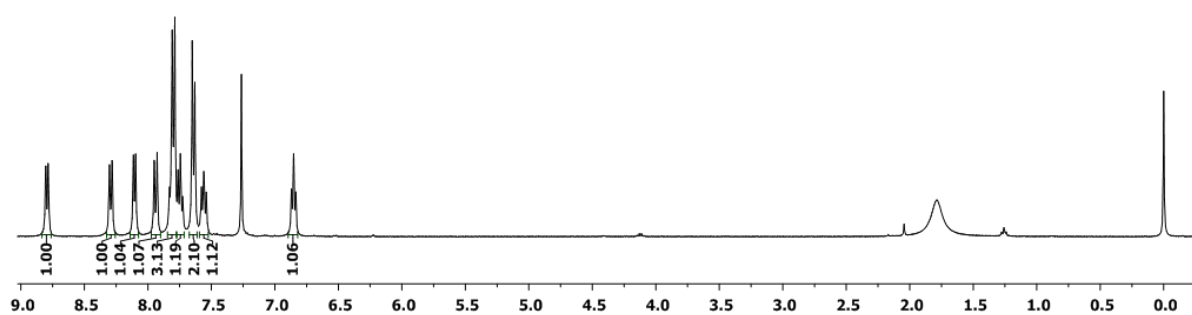

$^1\text{H}$  NMR spectrum of compound **4d**

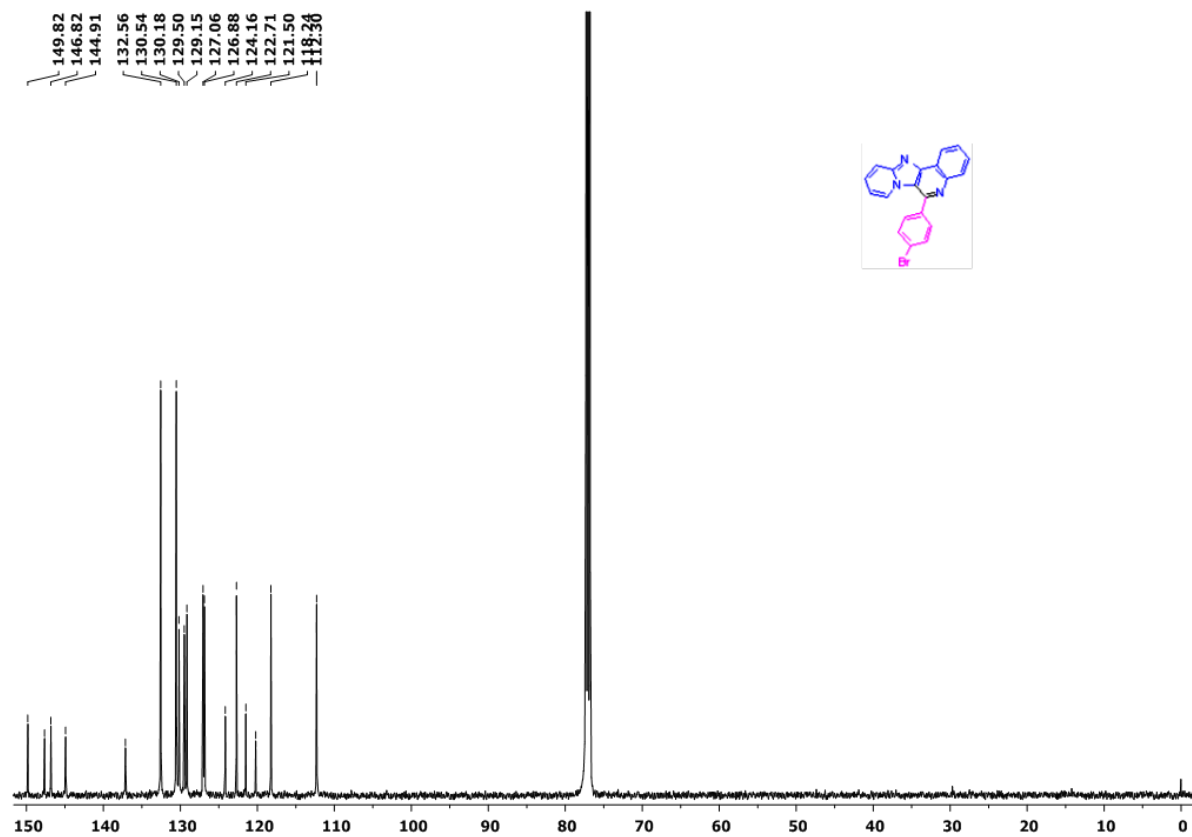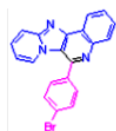

$^{13}\text{C}$  NMR spectrum of compound **4d**

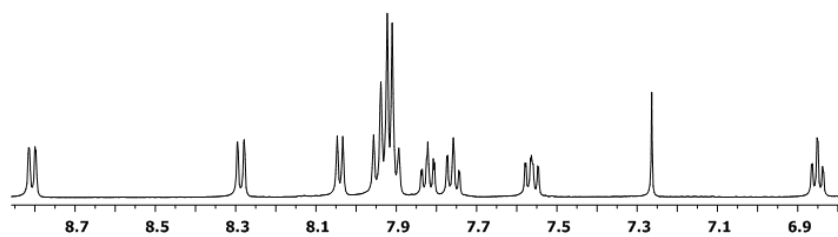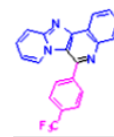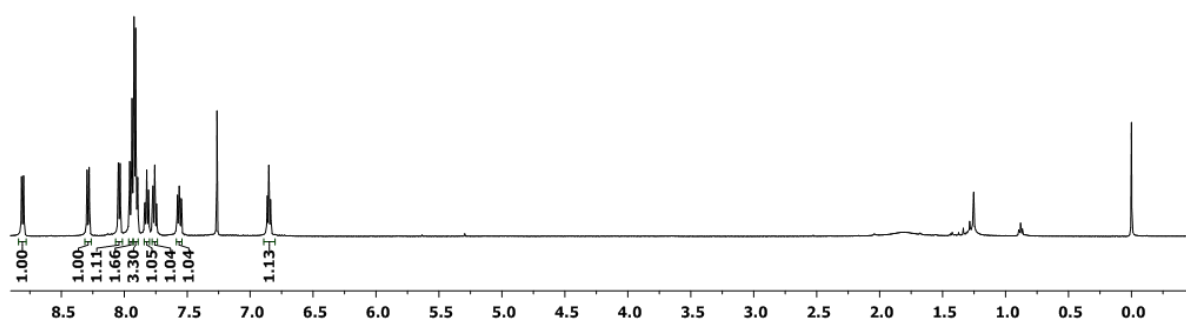

<sup>1</sup>H NMR spectrum of compound 4e

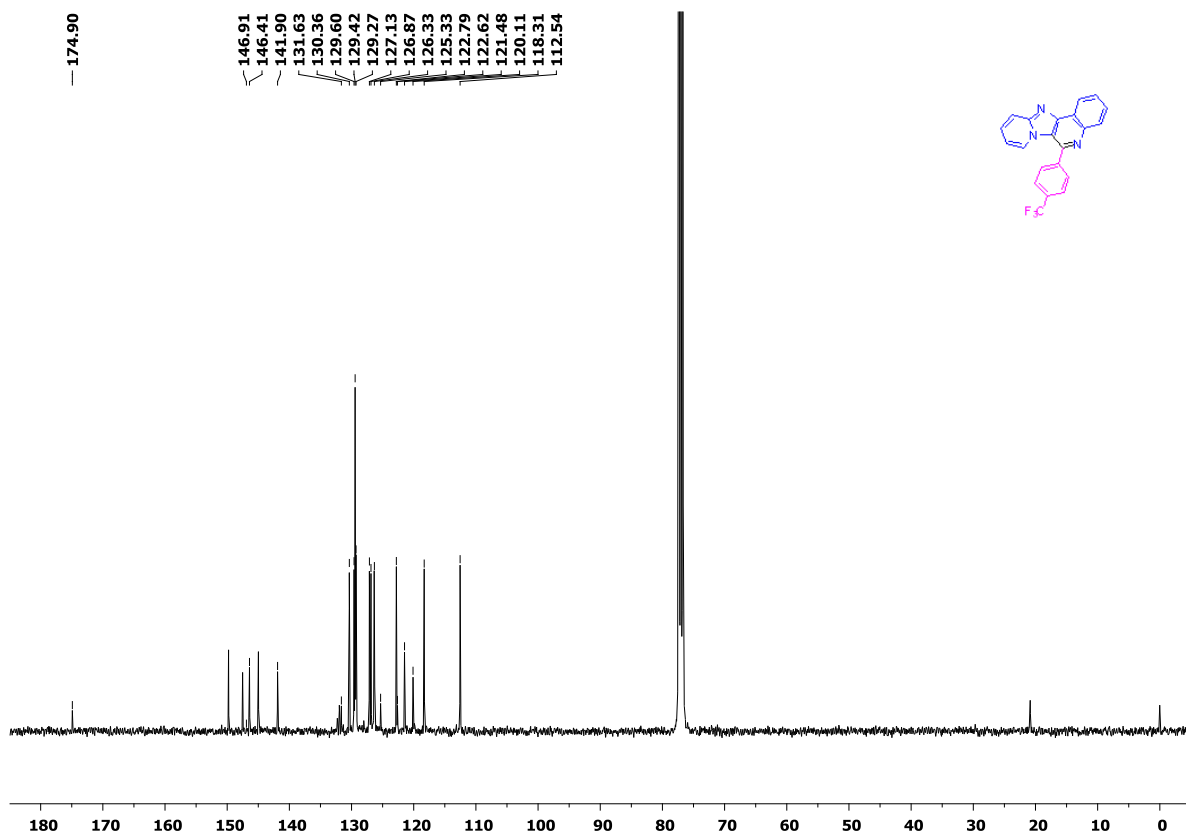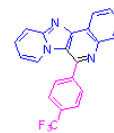

<sup>13</sup>C NMR spectrum of compound 4e

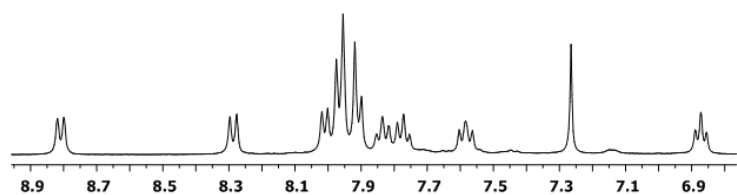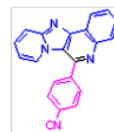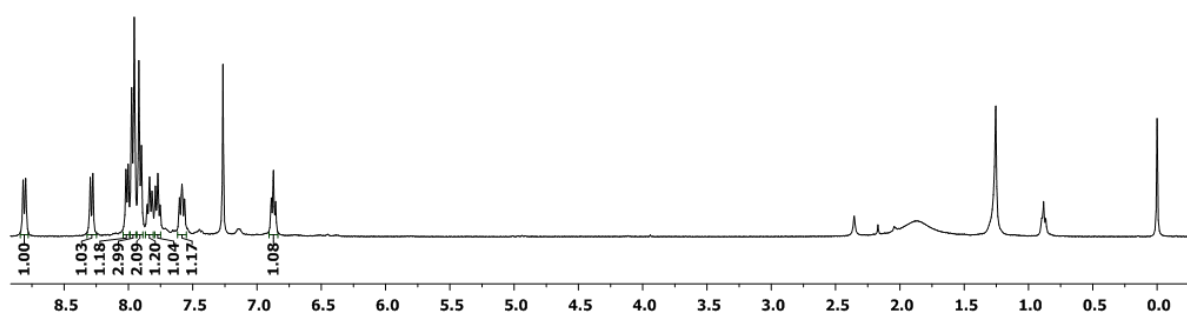

<sup>1</sup>H NMR spectrum of compound **4f**

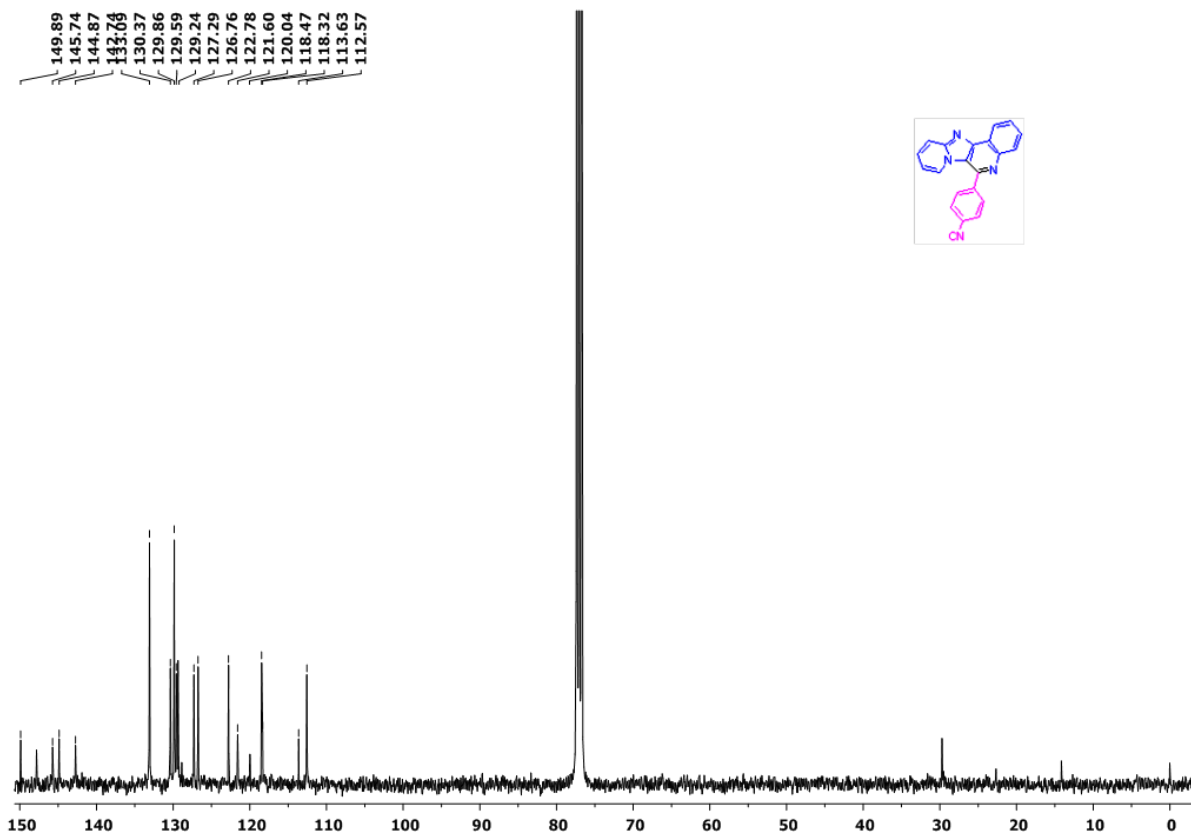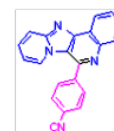

<sup>13</sup>C NMR spectrum of compound **4f**

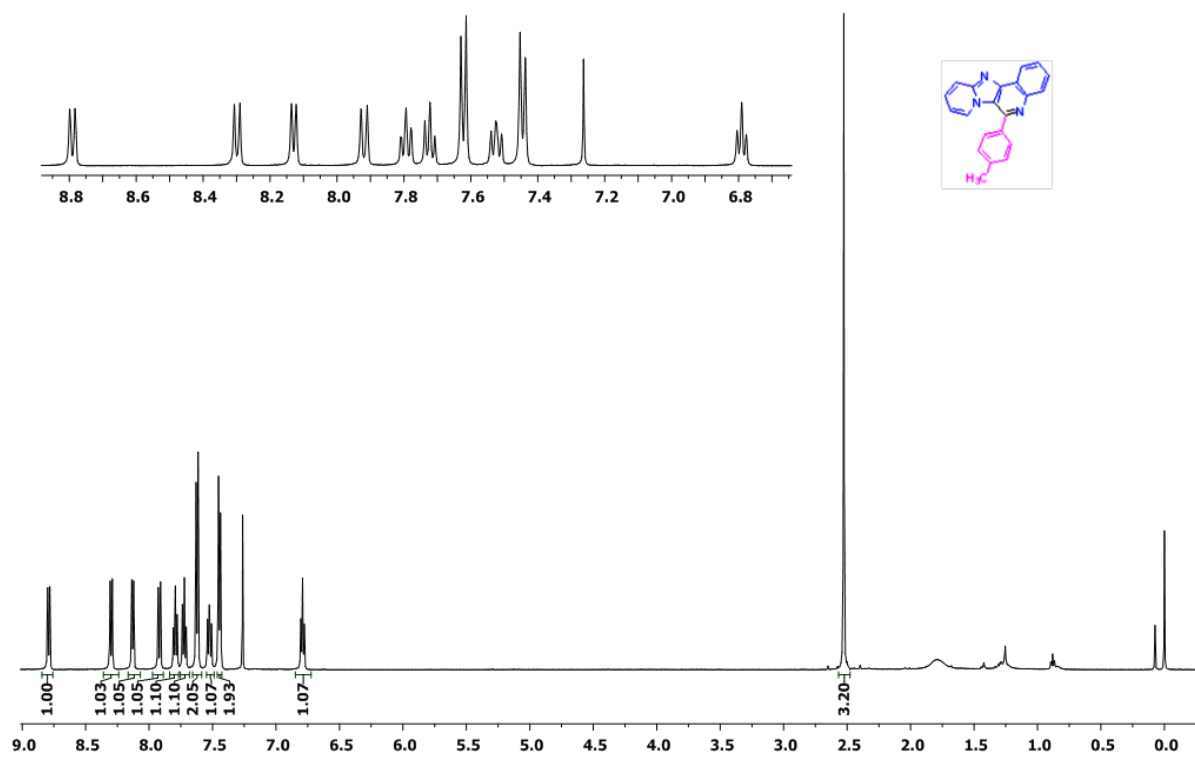

<sup>1</sup>H NMR spectrum of compound **4g**

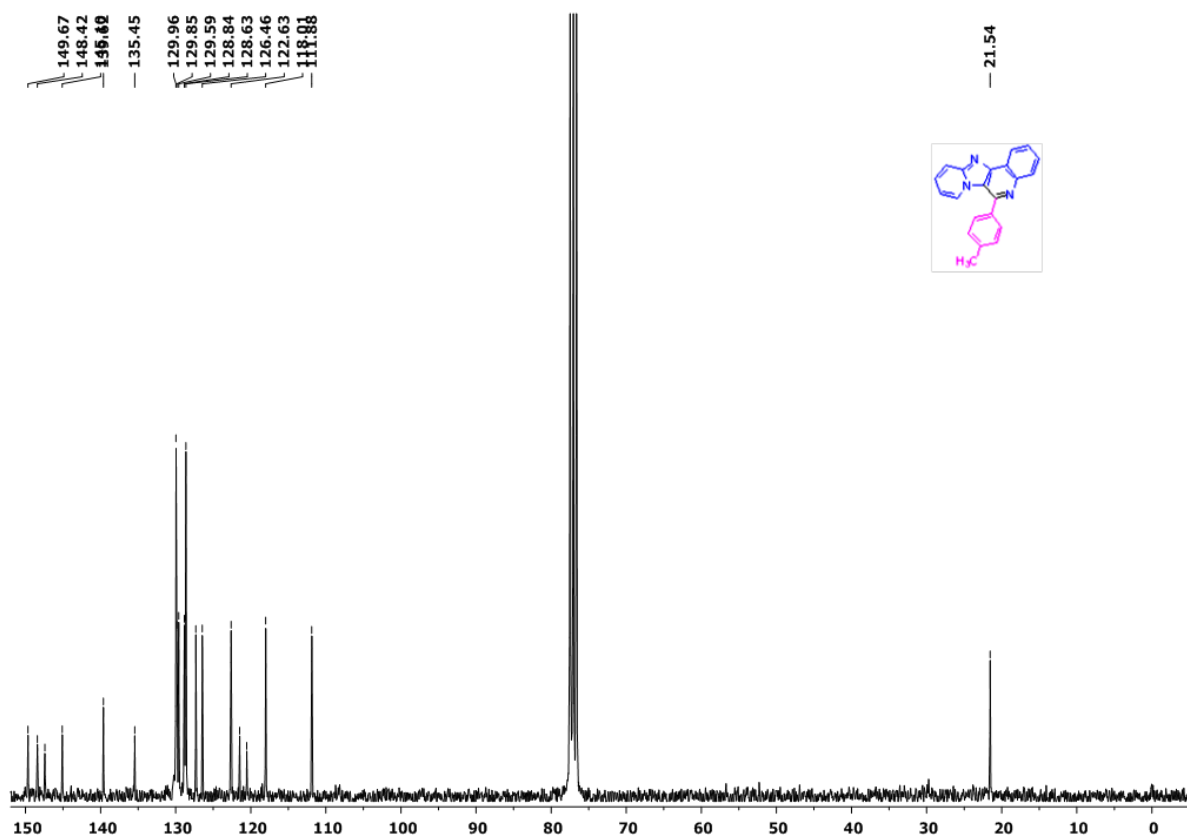

<sup>13</sup>C NMR spectrum of compound **4g**



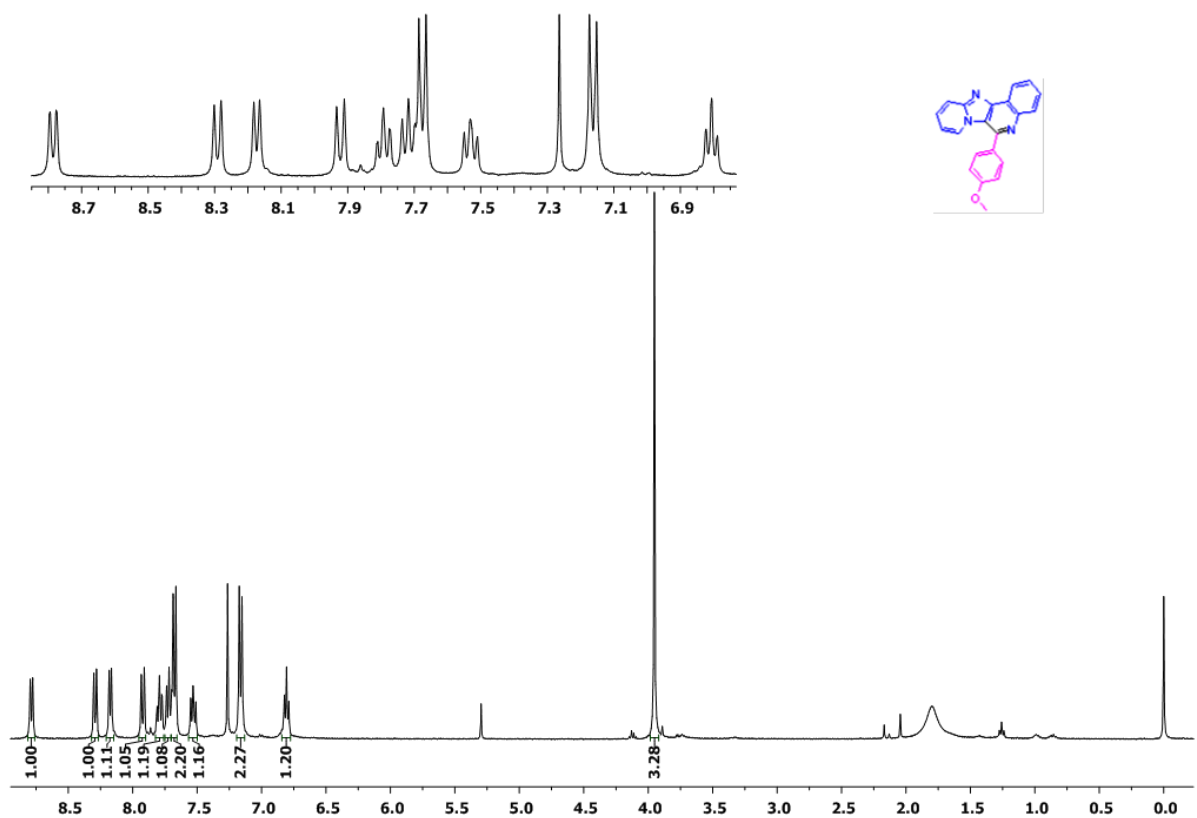

<sup>1</sup>H NMR spectrum of compound **4h**

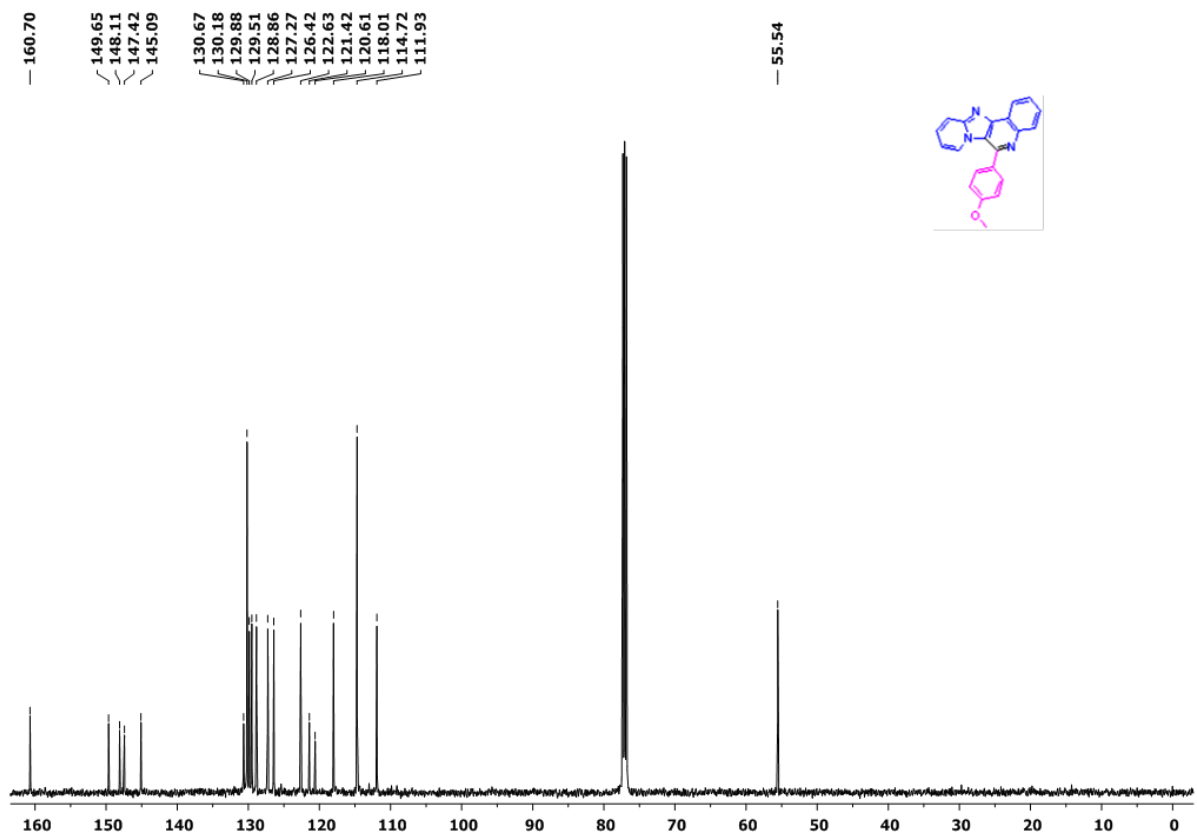

<sup>13</sup>C NMR spectrum of compound **4h**

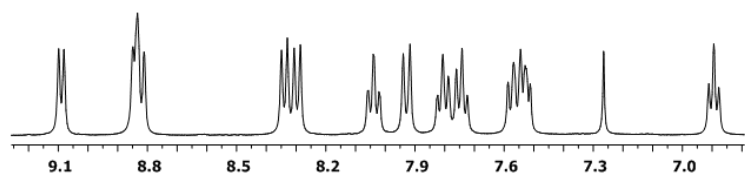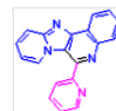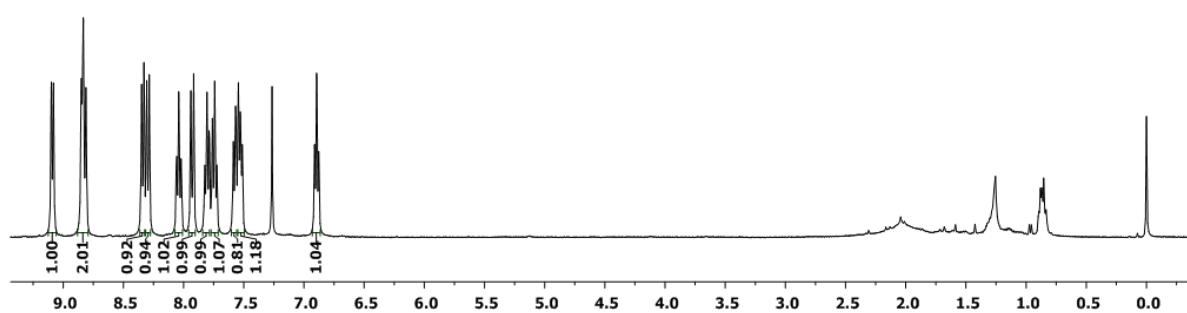

<sup>1</sup>H NMR spectrum of compound 4i

157.22  
 149.93  
 148.45  
 148.26  
 146.58  
 144.69  
 137.84  
 130.21  
 129.97  
 129.57  
 128.86  
 126.95  
 125.38  
 124.46  
 122.80  
 117.58

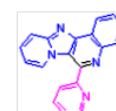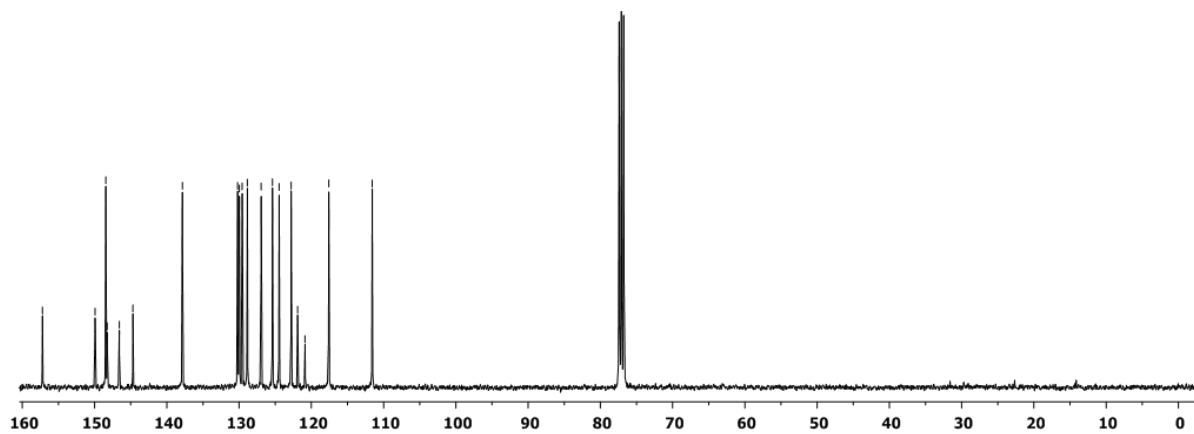

<sup>13</sup>C NMR spectrum of compound 4i

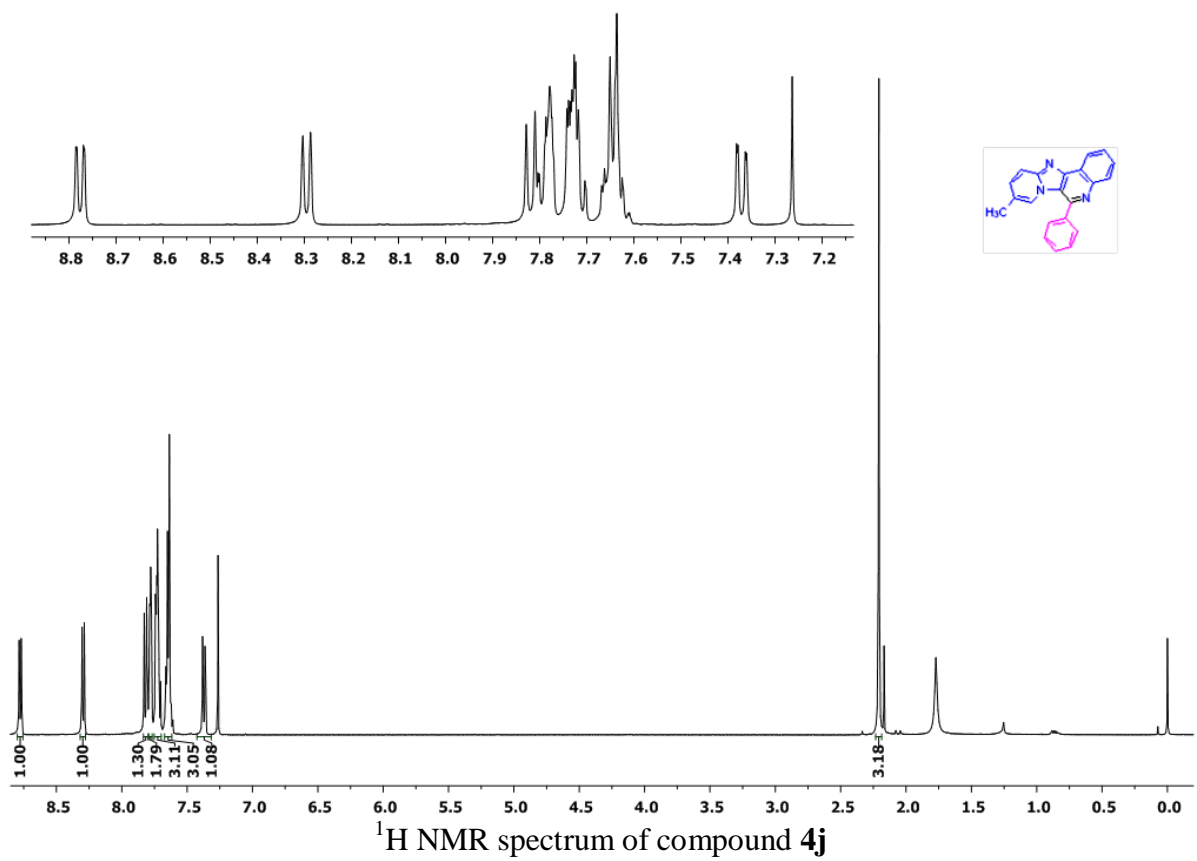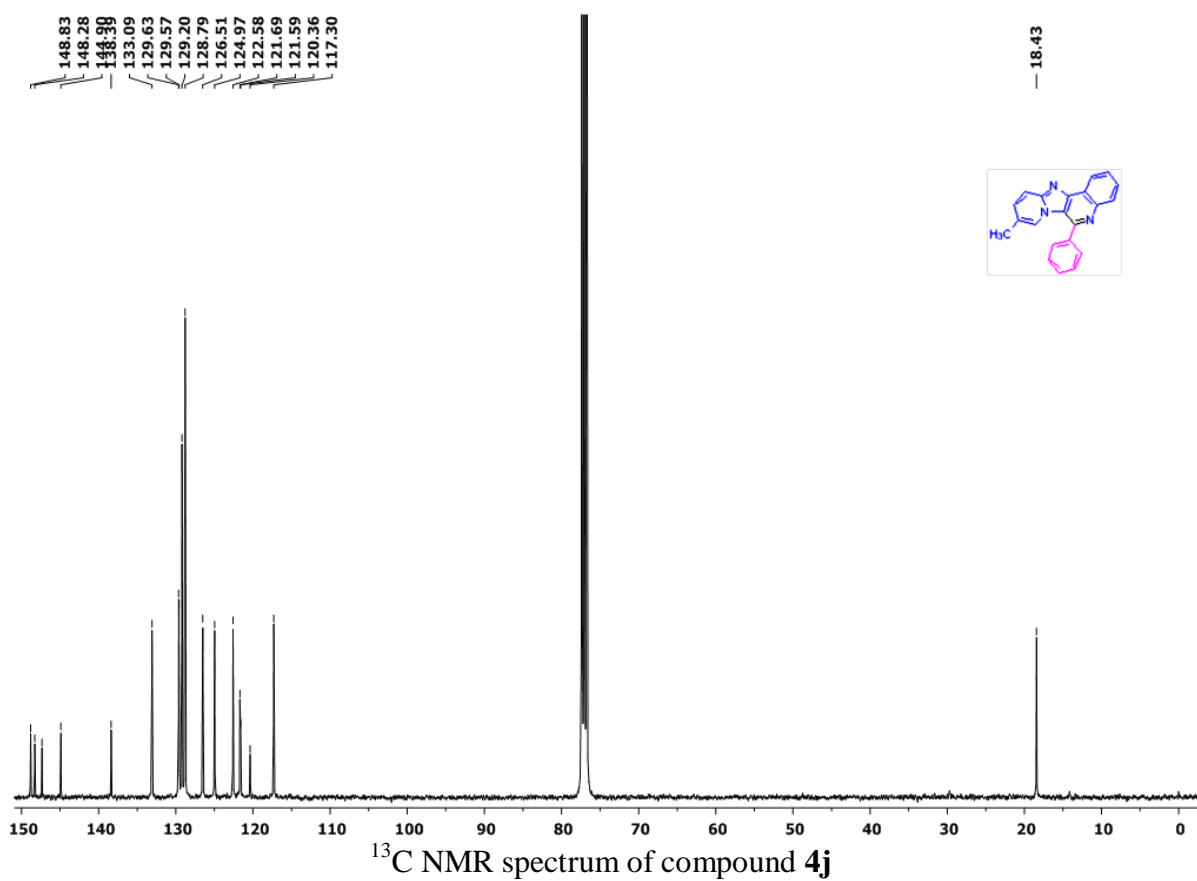

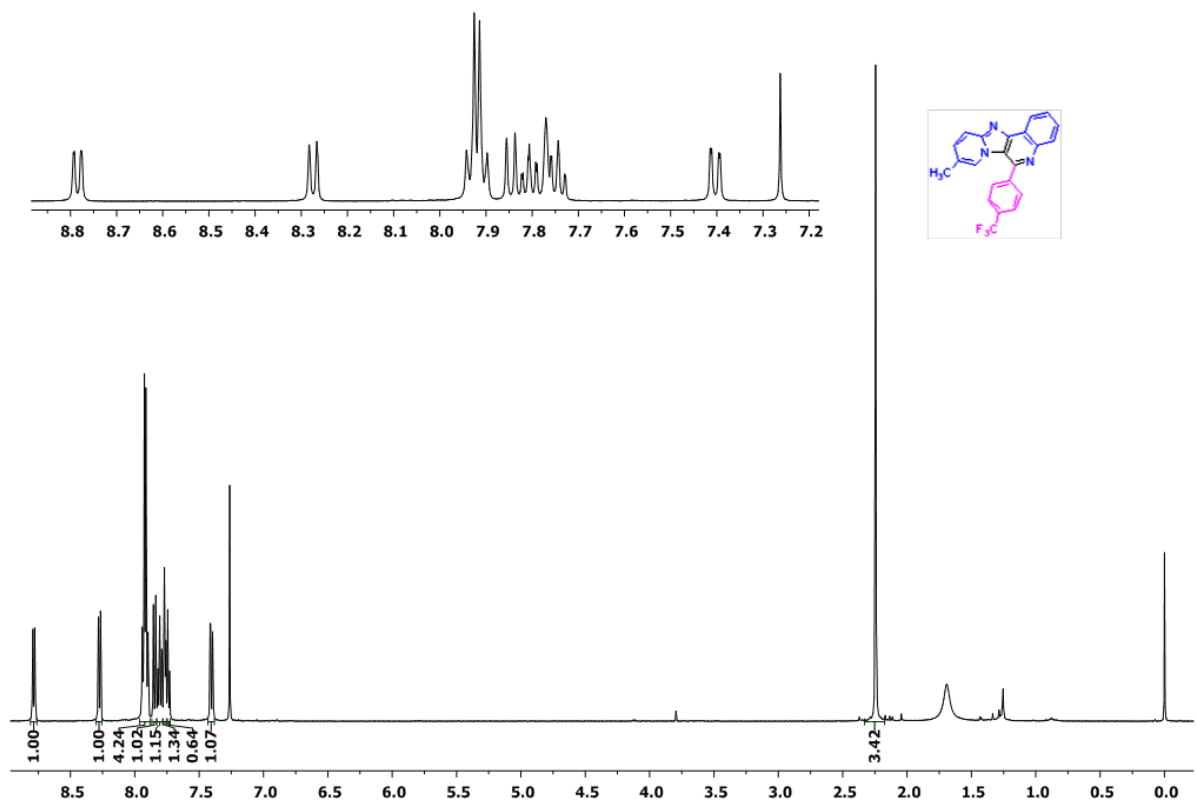

<sup>1</sup>H NMR spectrum of compound **4k**

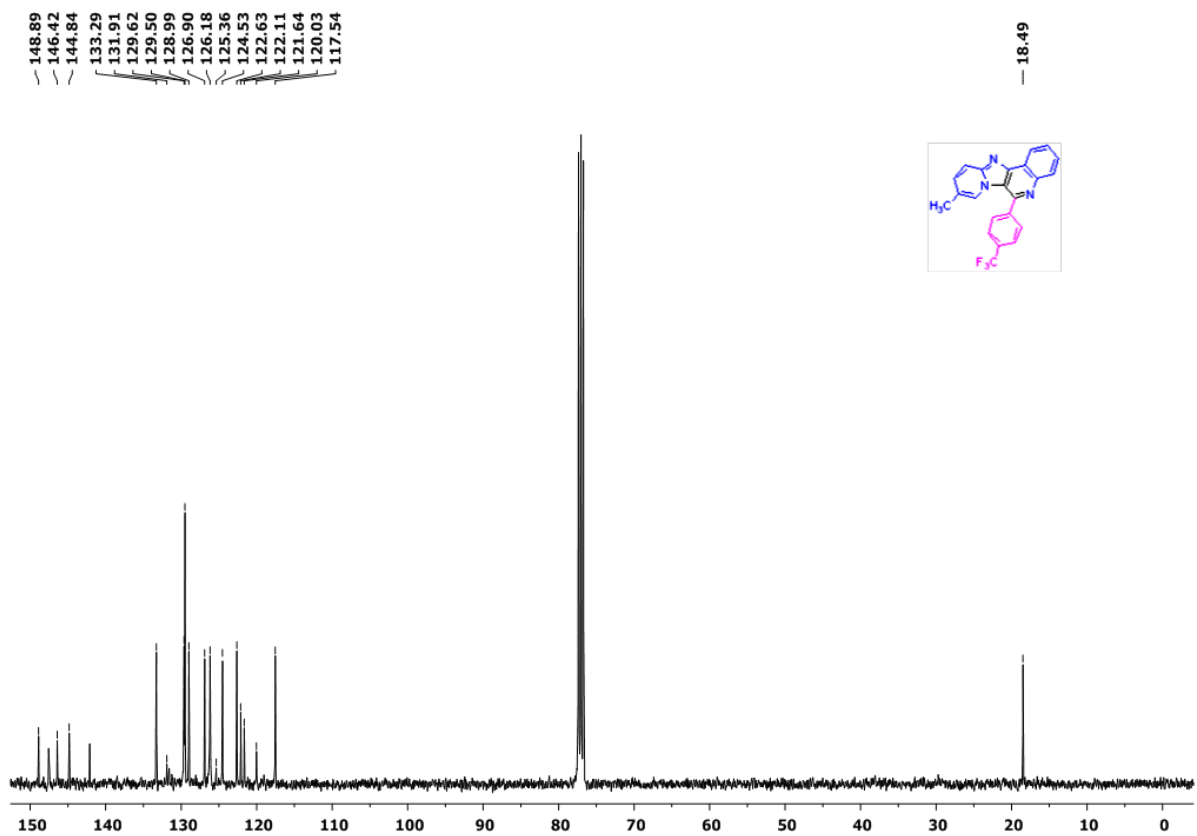

<sup>13</sup>C NMR spectrum of compound **4k**

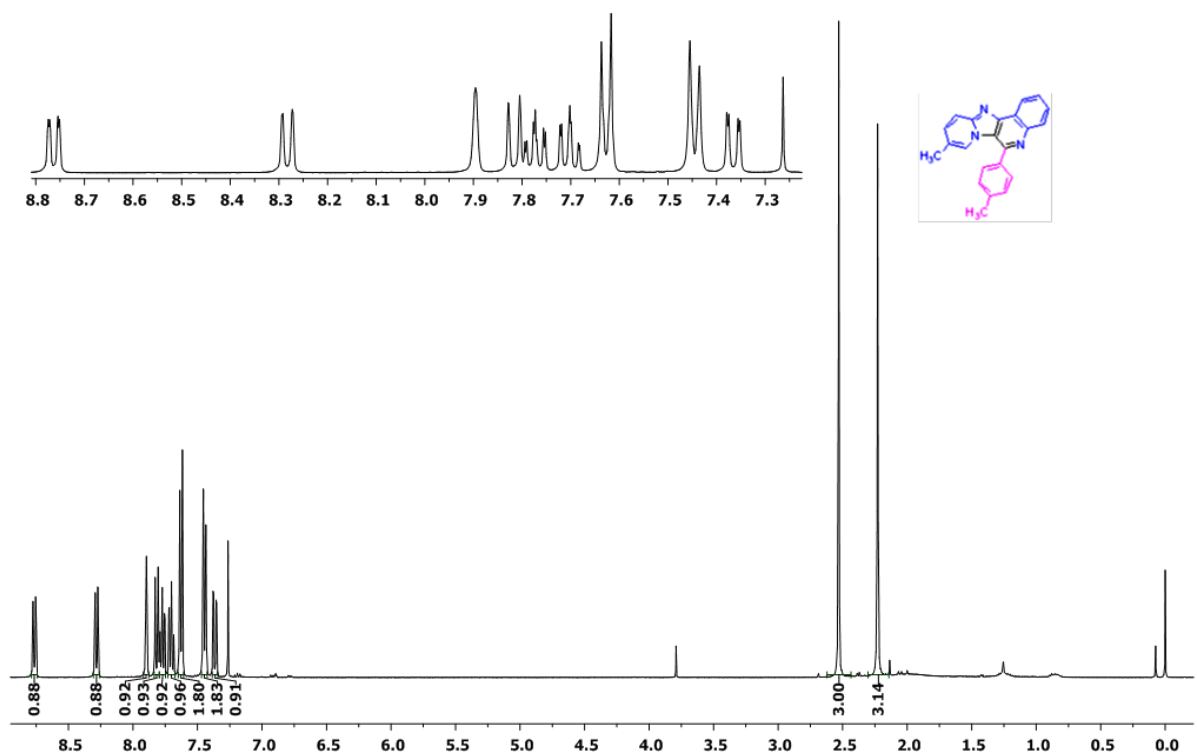

$^1\text{H}$  NMR spectrum of compound **41**

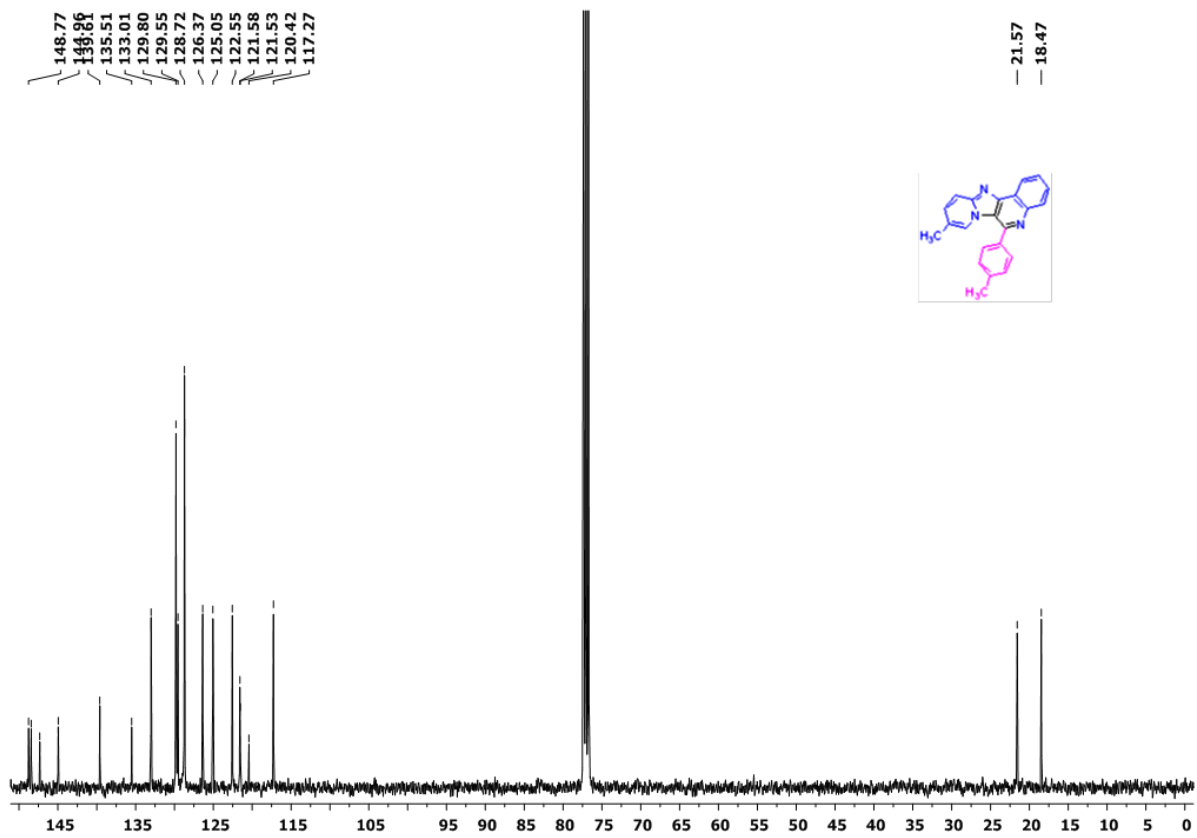

$^{13}\text{C}$  NMR spectrum of compound **41**

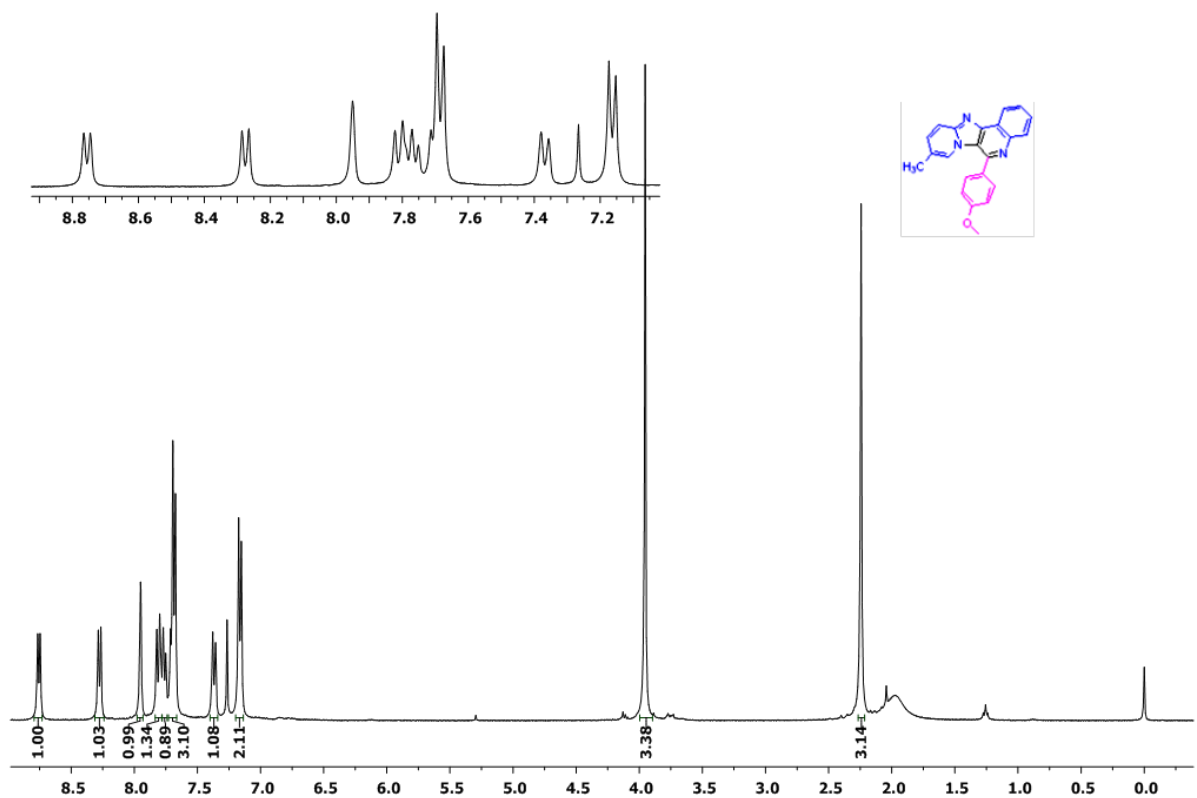

$^1\text{H}$  NMR spectrum of compound **4m**

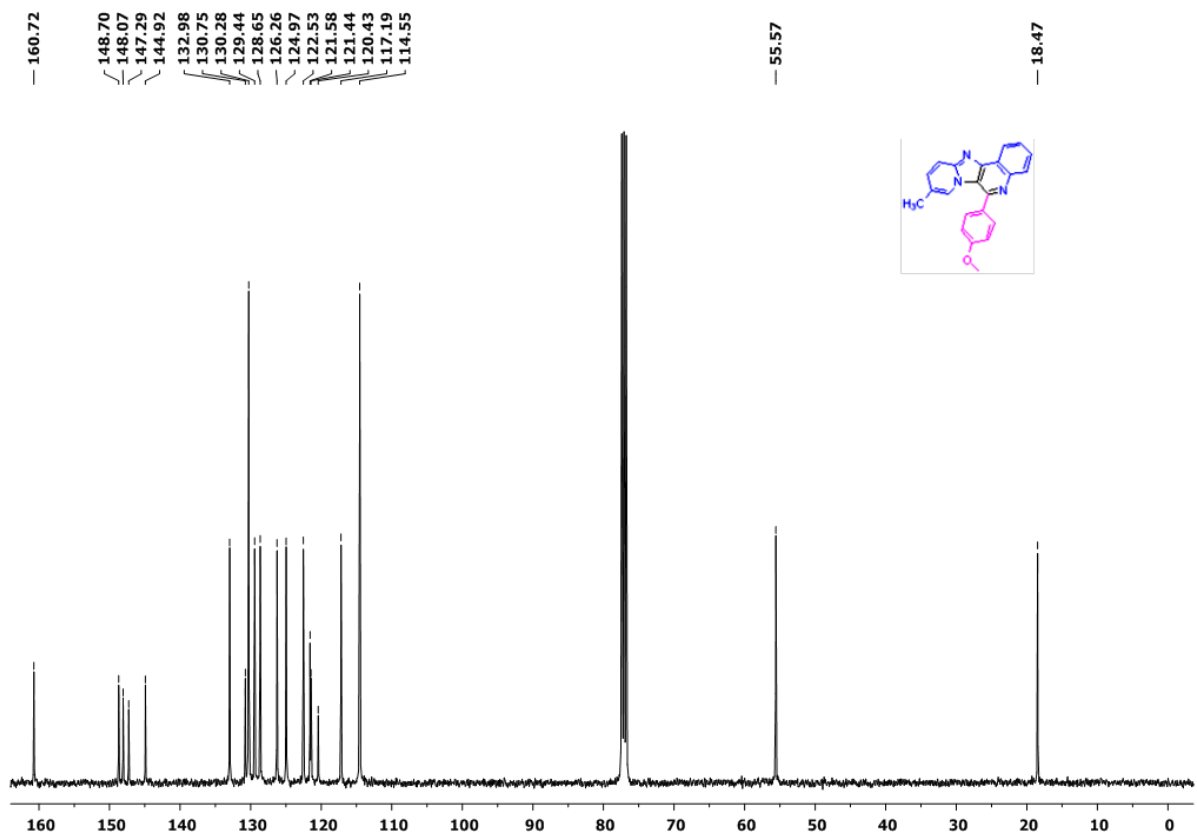

$^{13}\text{C}$  NMR spectrum of compound **4m**

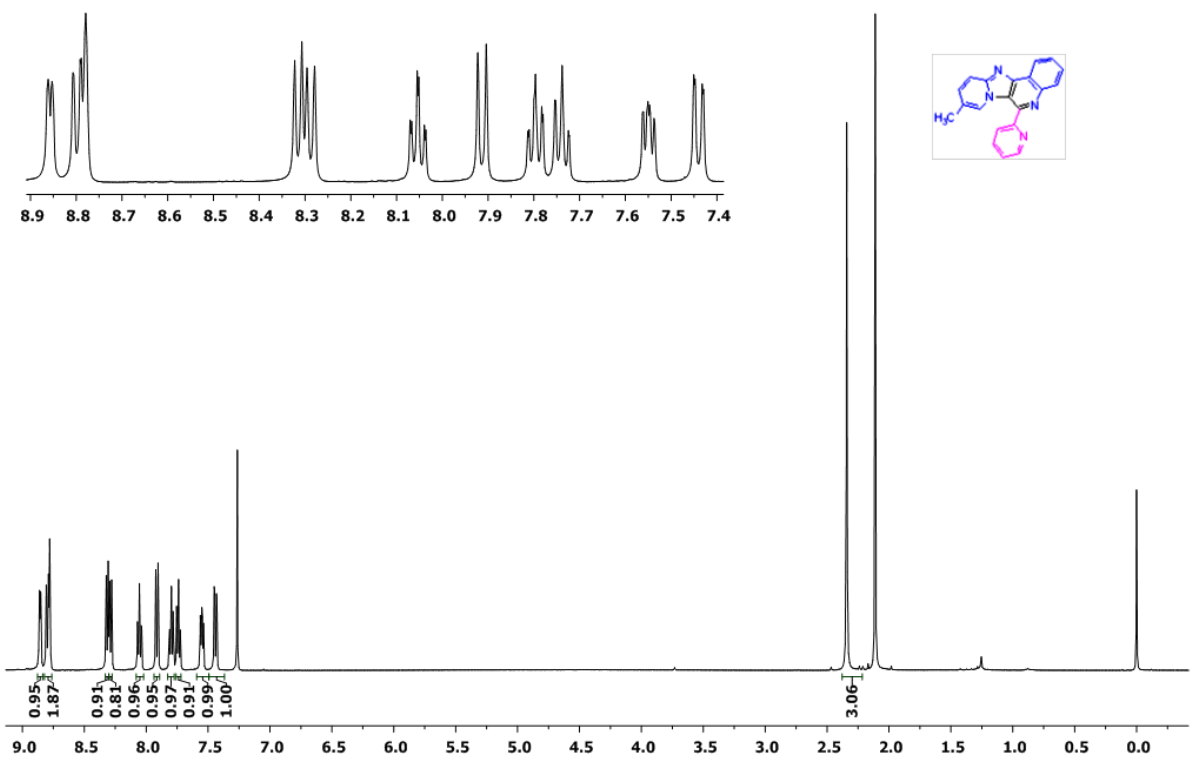

$^1\text{H}$  NMR spectrum of compound **4n**

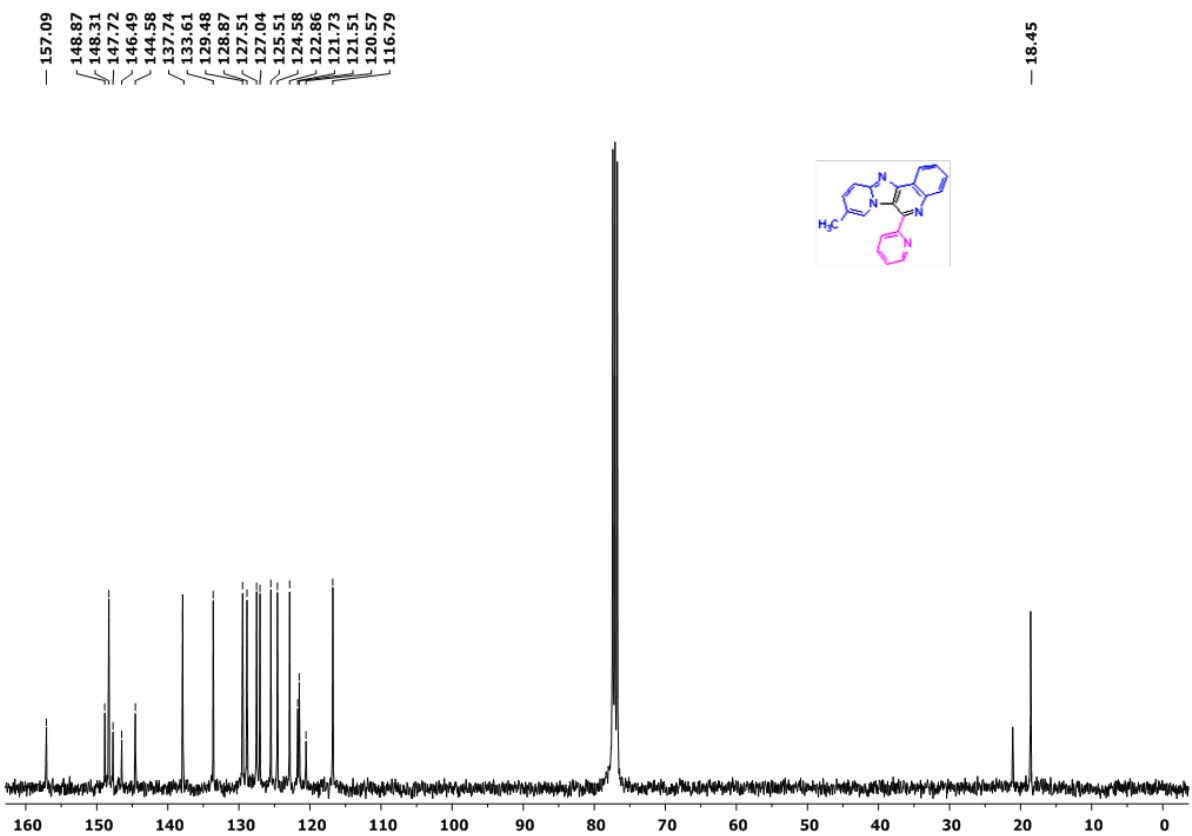

$^{13}\text{C}$  NMR spectrum of compound **4n**

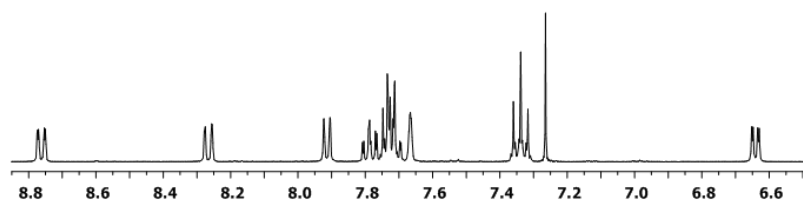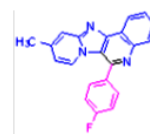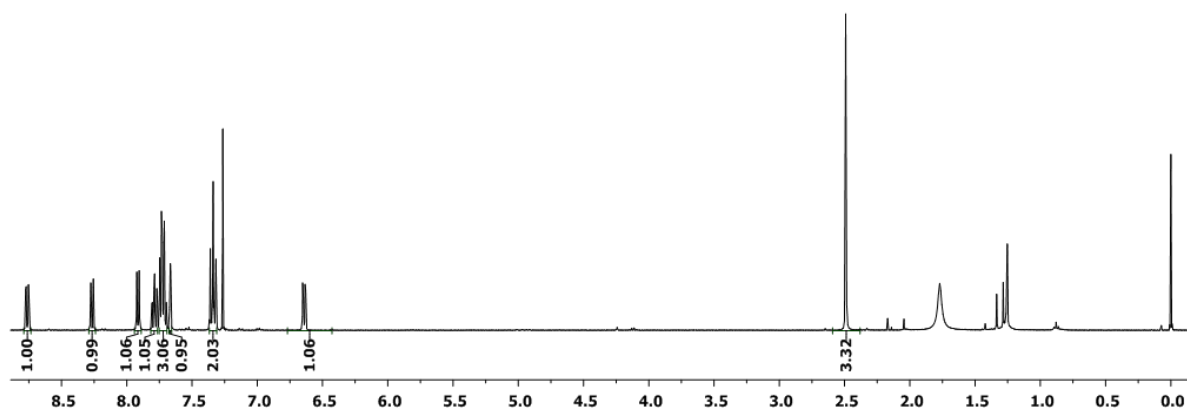

<sup>1</sup>H NMR spectrum of compound **4o**

— 163.61  
 — 150.27  
 — 147.72  
 — 146.77  
 — 144.99  
 — 141.77  
 — 134.54  
 — 130.86  
 — 129.47  
 — 128.86  
 — 126.51  
 — 122.67  
 — 121.47  
 — 120.30  
 — 116.49  
 — 116.37  
 — 114.86

— 21.78

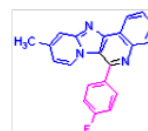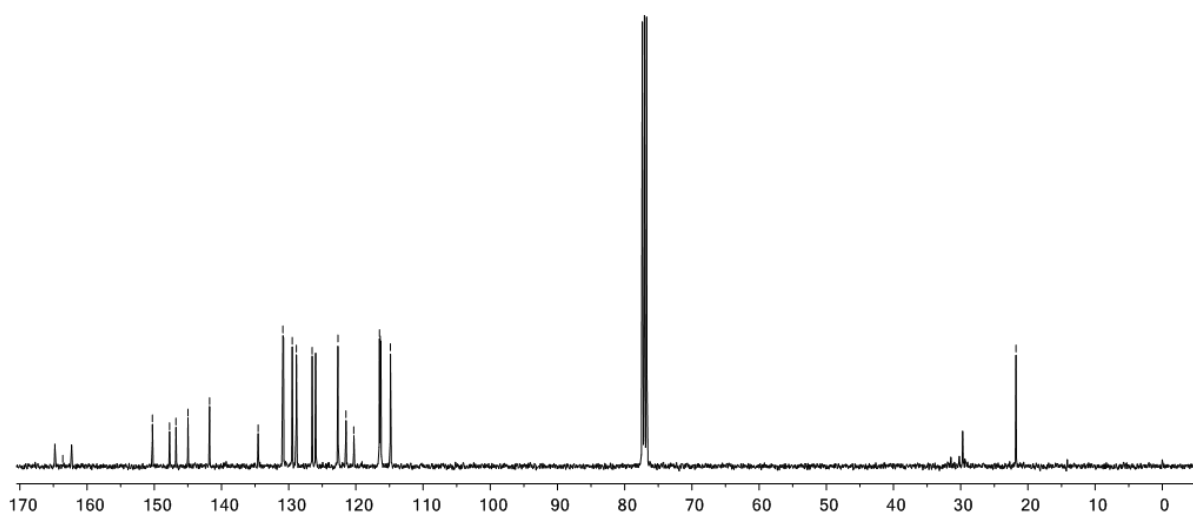

<sup>13</sup>C NMR spectrum of compound **4o**



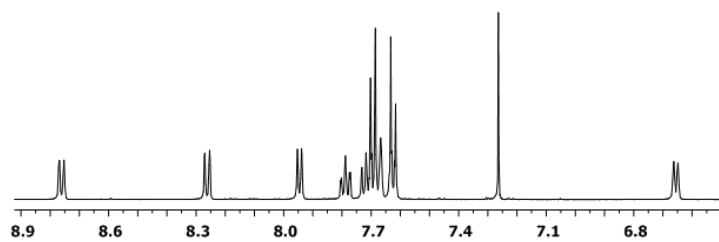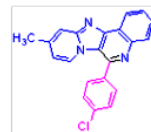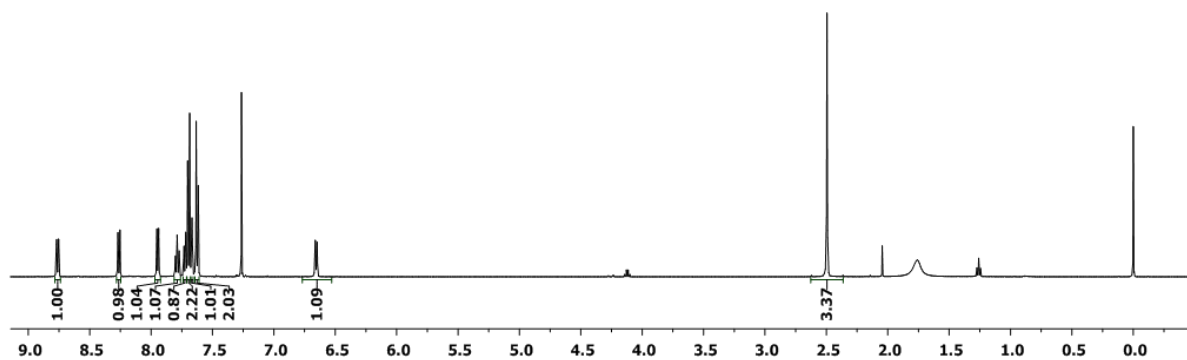

<sup>1</sup>H NMR spectrum of compound **4p**

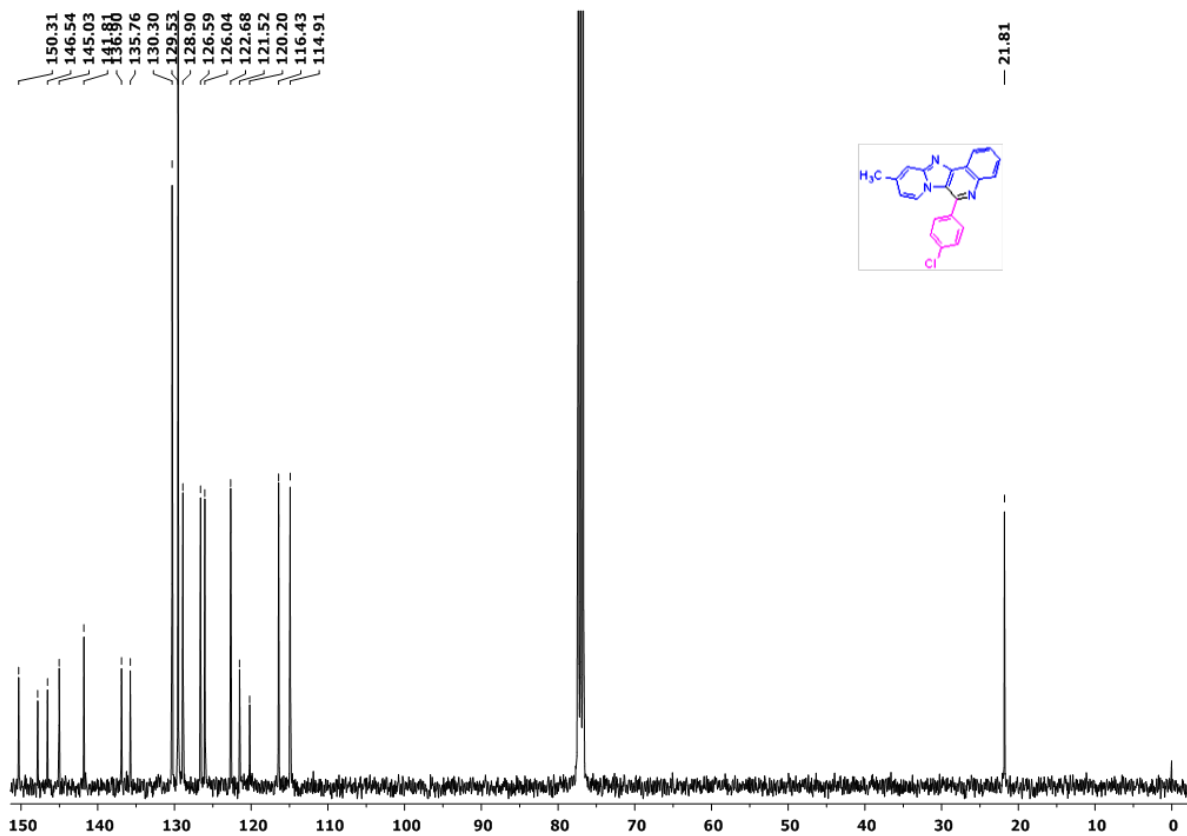

<sup>13</sup>C NMR spectrum of compound **4p**

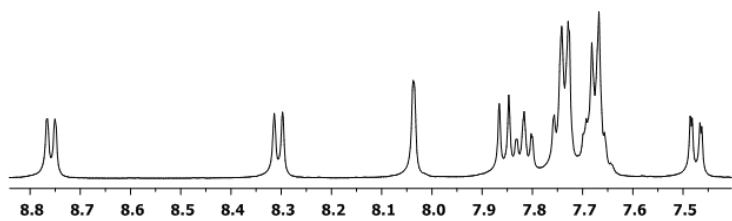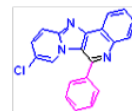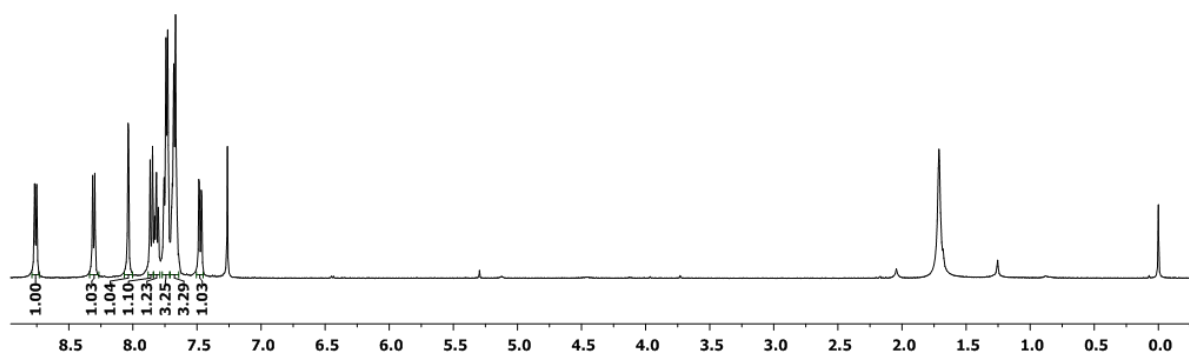

<sup>1</sup>H NMR spectrum of compound 4q

156.79  
146.44  
145.07  
137.72  
137.55  
131.18  
130.02  
129.72  
129.47  
129.22  
128.63  
126.93  
122.62  
118.34

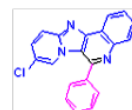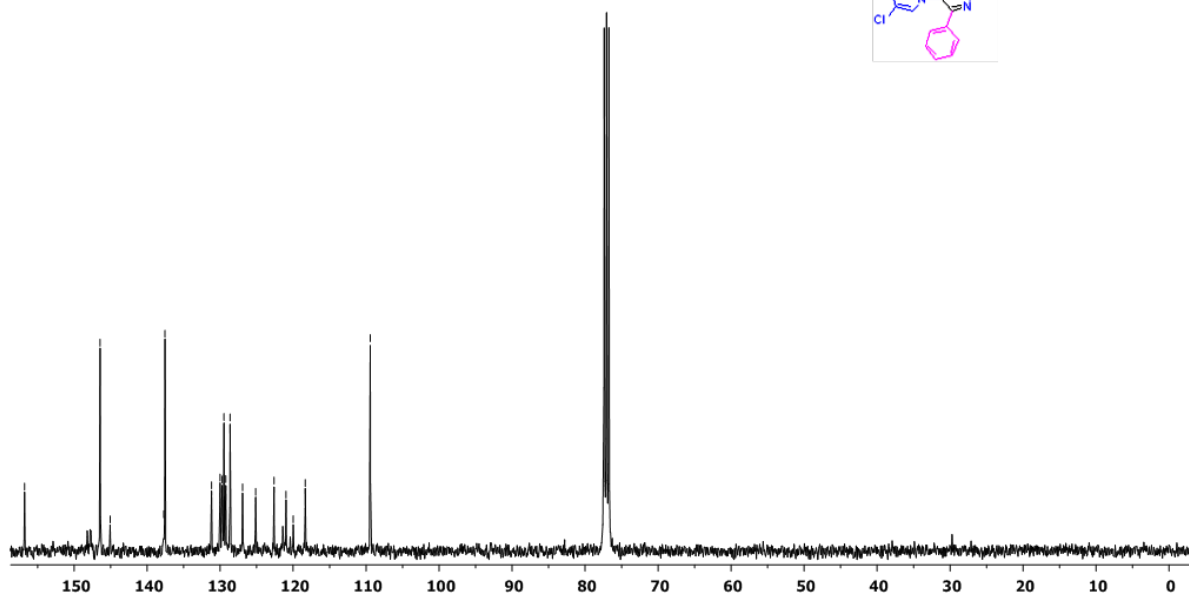

<sup>13</sup>C NMR spectrum of compound 4q

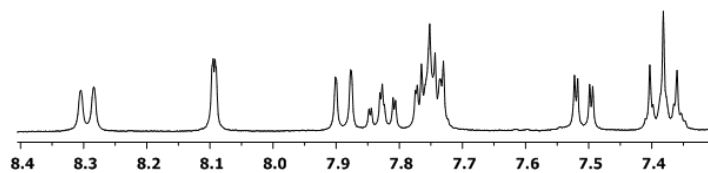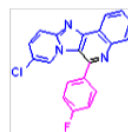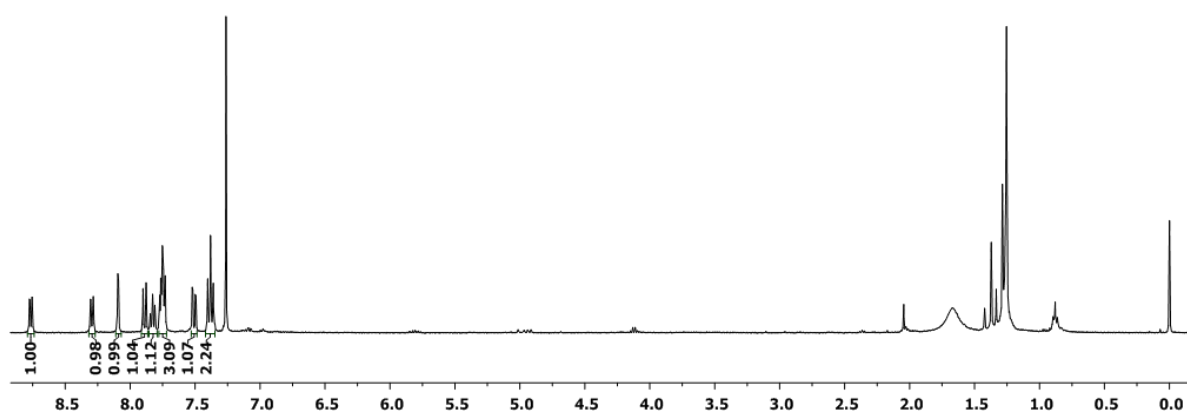

<sup>1</sup>H NMR spectrum of compound 4r

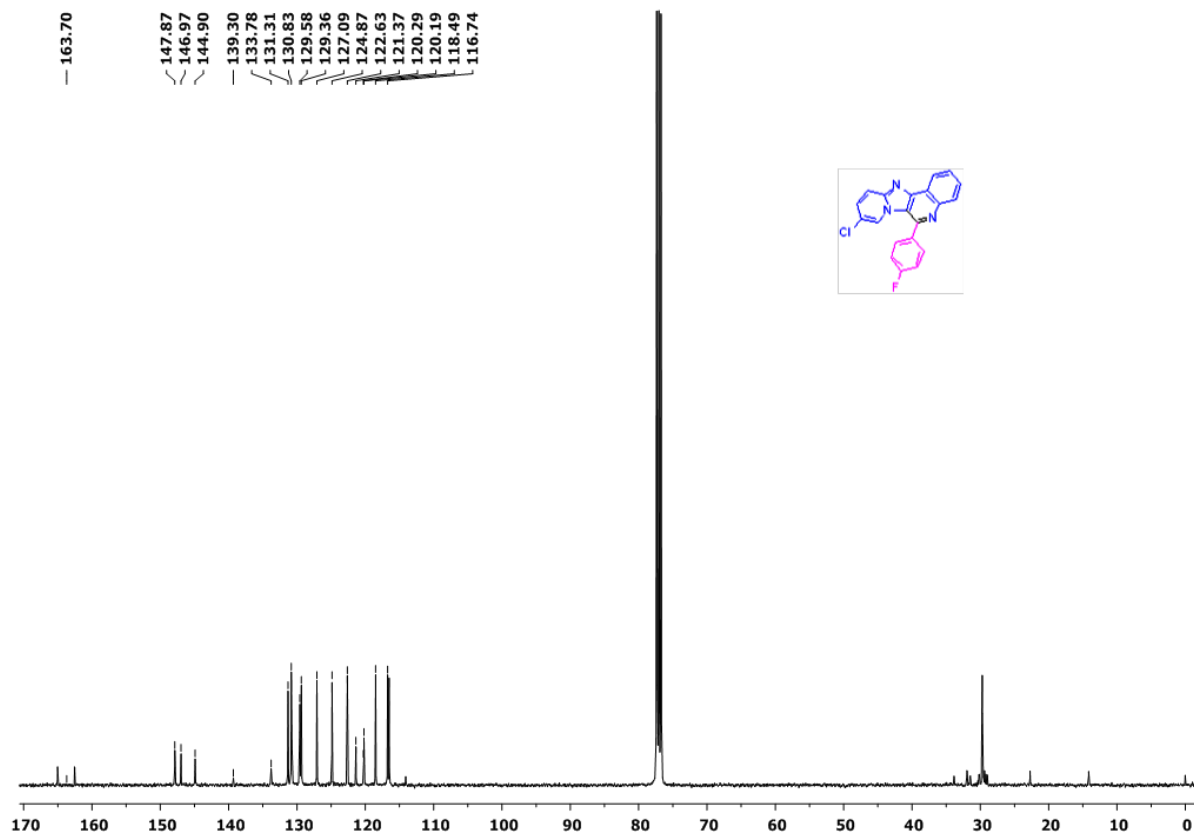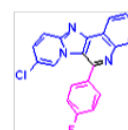

<sup>13</sup>C NMR spectrum of compound 4r

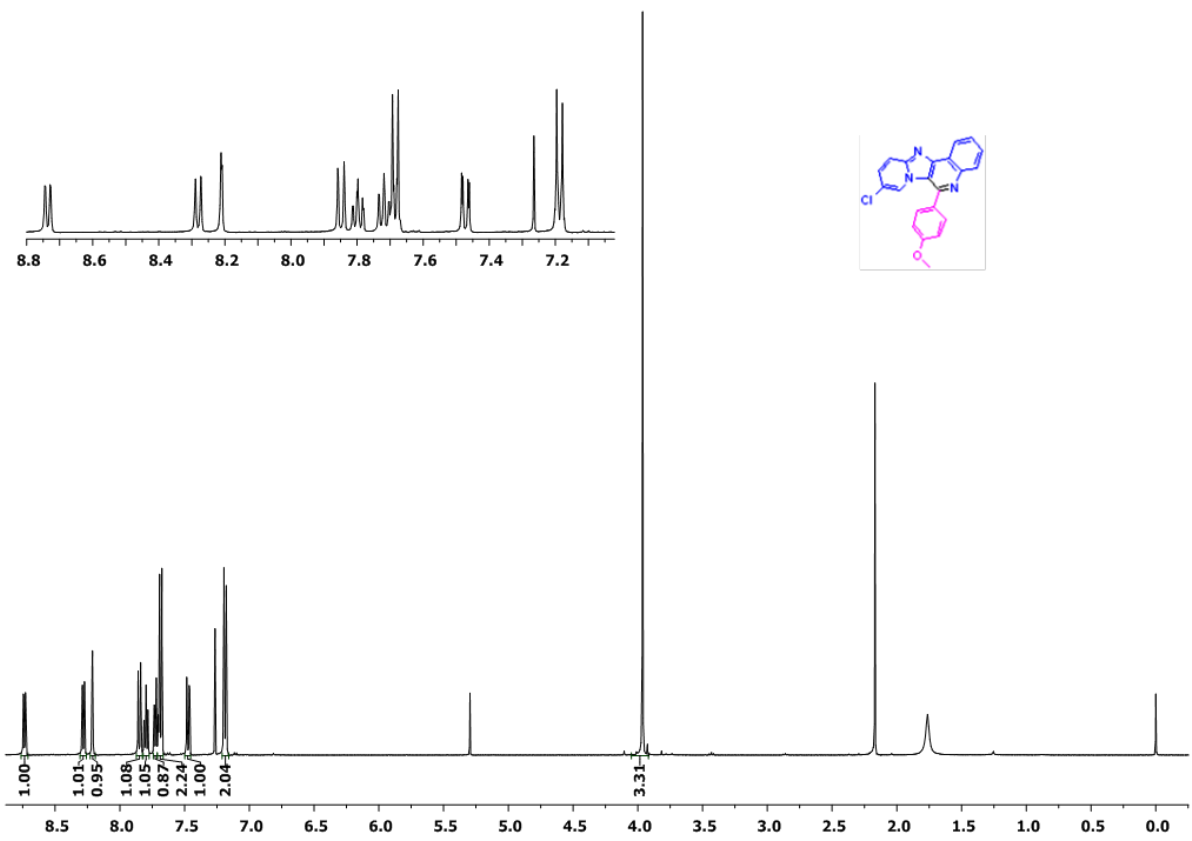

$^1\text{H}$  NMR spectrum of compound **4s**

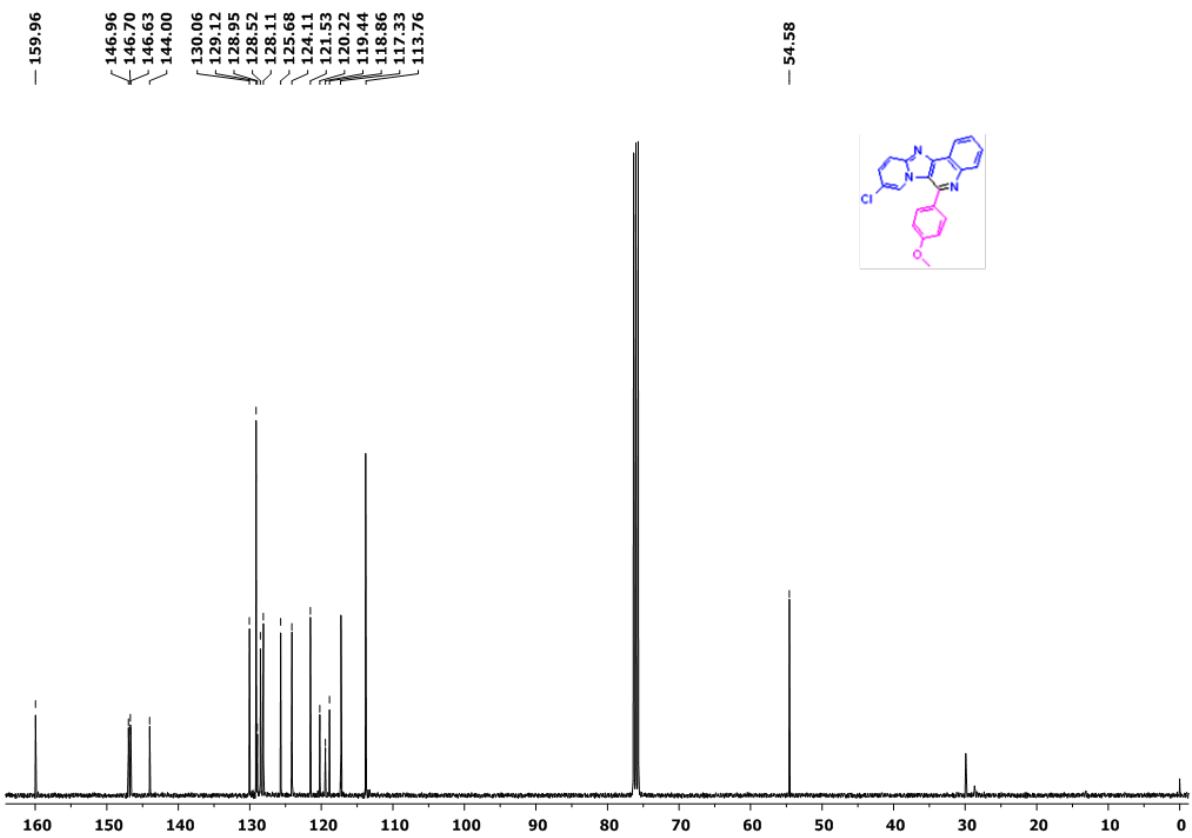

$^{13}\text{C}$  NMR spectrum of compound **4s**

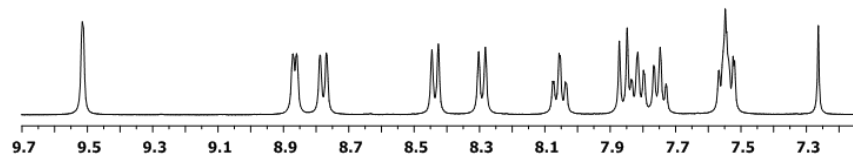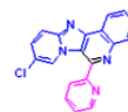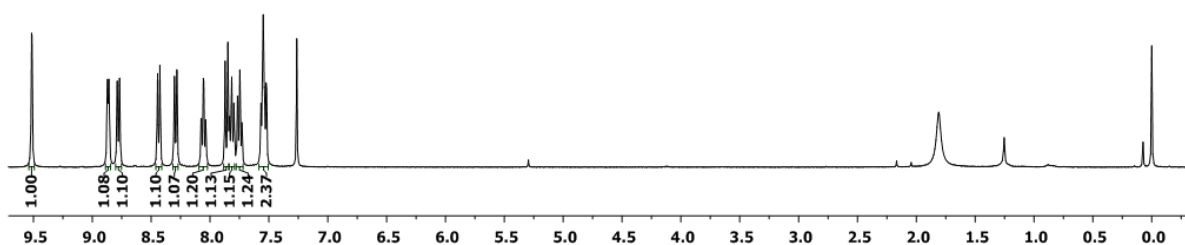

<sup>1</sup>H NMR spectrum of compound **4t**

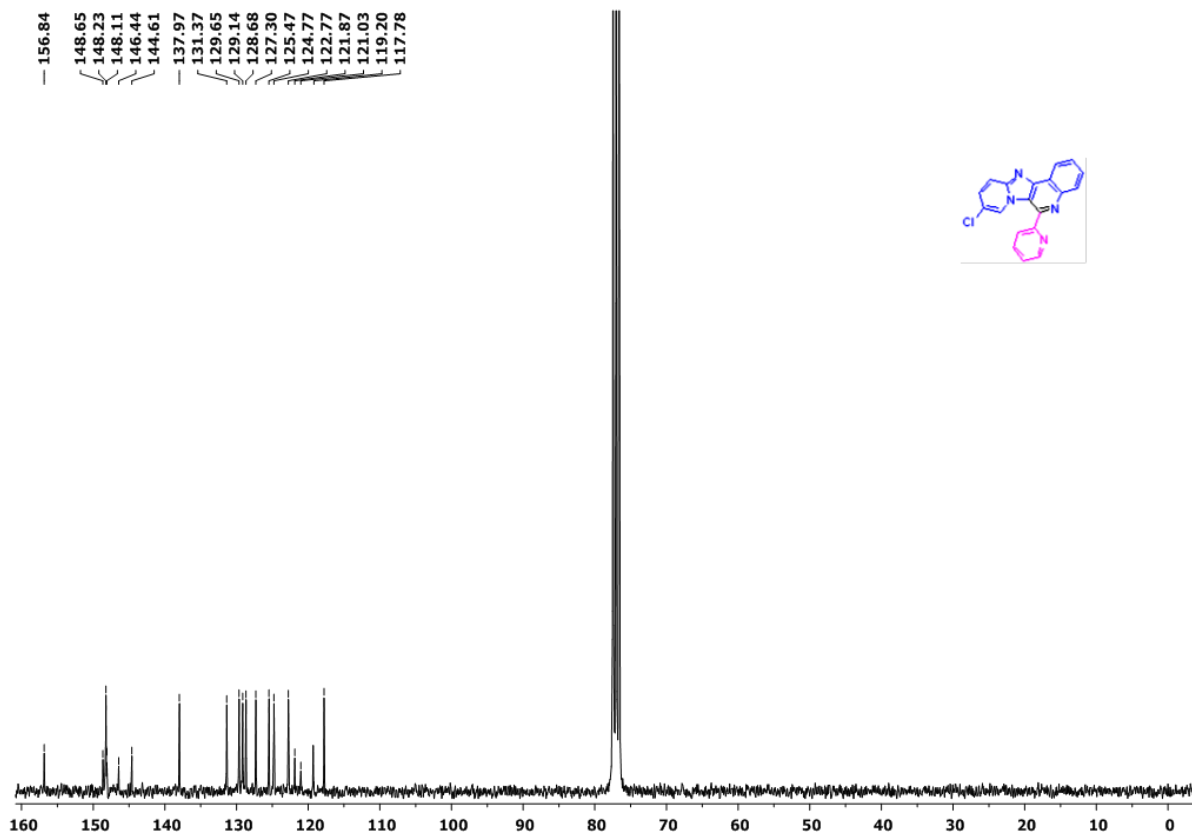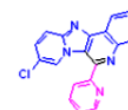

<sup>13</sup>C NMR spectrum of compound **4t**

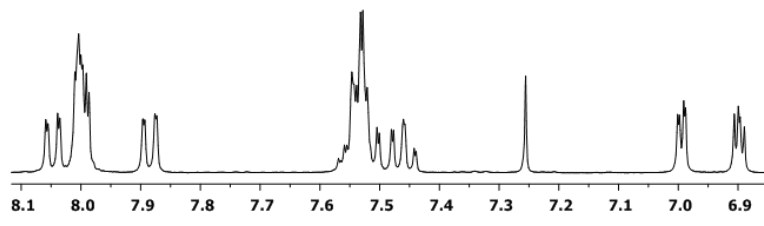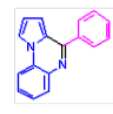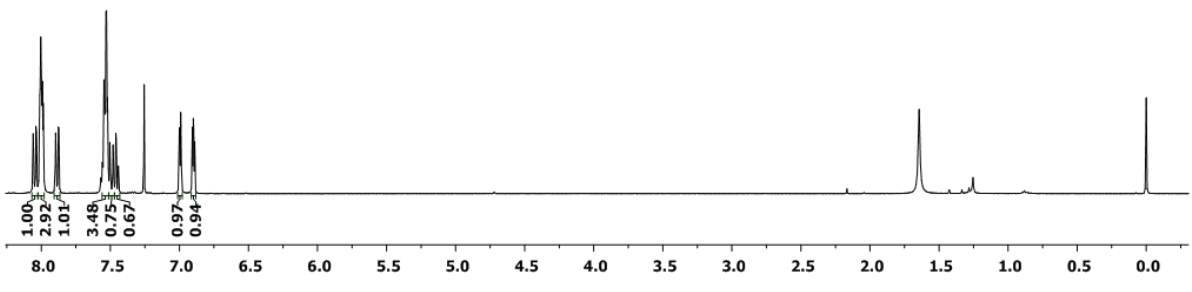

<sup>1</sup>H NMR spectrum of compound **6a**

- 154.45
- 138.50
- 136.30
- 130.28
- 129.83
- 128.65
- 128.62
- 127.50
- 125.43
- 124.31
- 117.64
- 114.01
- 113.66
- 108.74

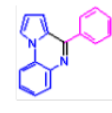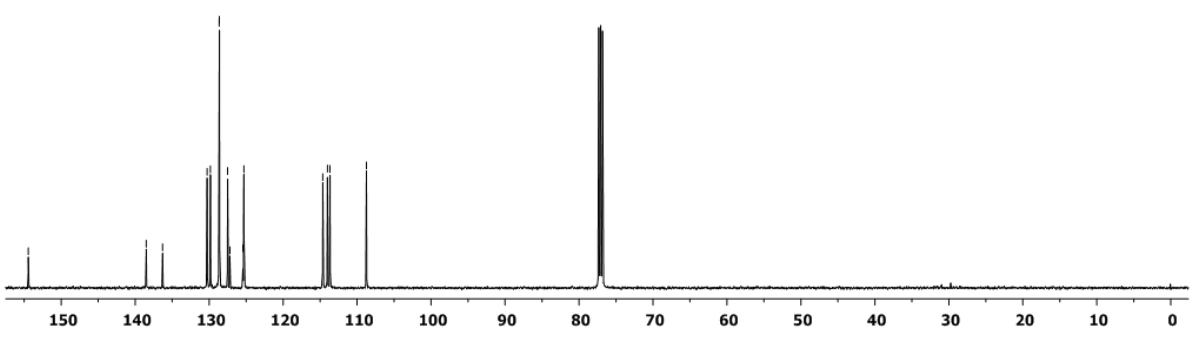

<sup>13</sup>C NMR spectrum of compound **6a**

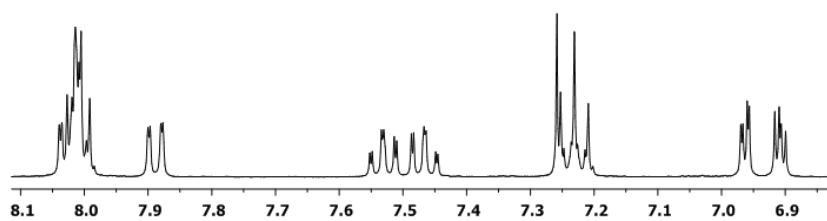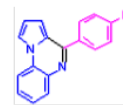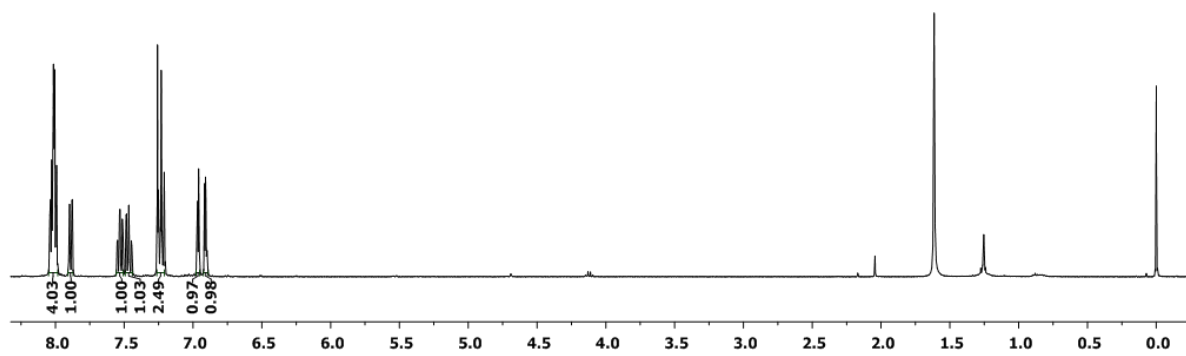

$^1\text{H}$  NMR spectrum of compound **6b**

$-\text{163.85}$   
 $-\text{153.26}$   
 $\text{136.17}$   
 $\text{134.63}$   
 $\text{130.62}$   
 $\text{130.21}$   
 $\text{127.61}$   
 $\text{127.14}$   
 $\text{125.39}$   
 $\text{125.24}$   
 $\text{115.55}$   
 $\text{114.79}$   
 $\text{114.09}$   
 $\text{113.69}$   
 $\text{108.57}$

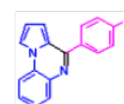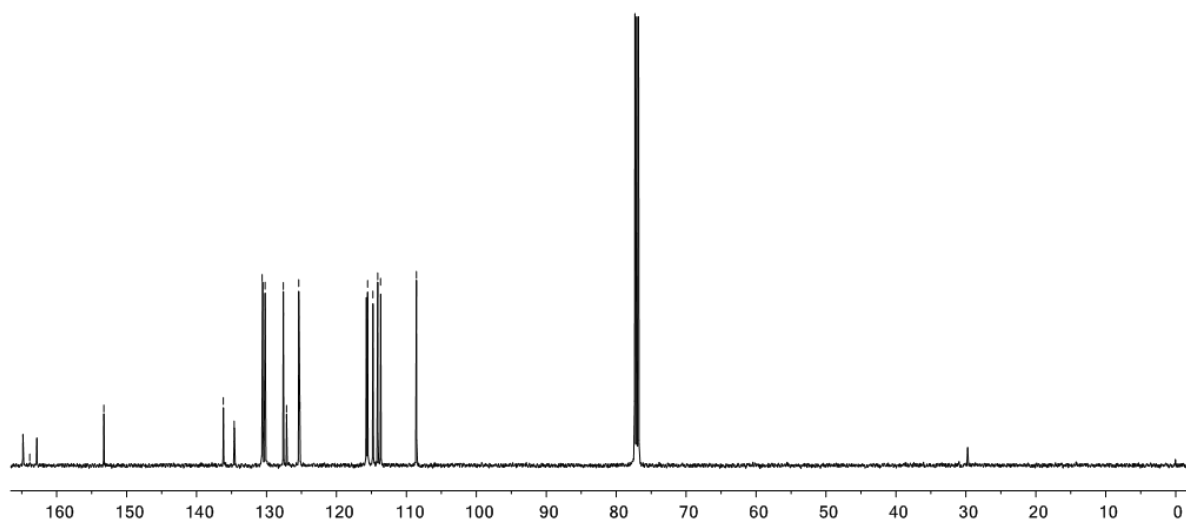

$^{13}\text{C}$  NMR spectrum of compound **6b**

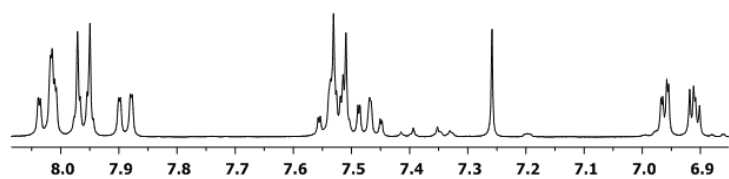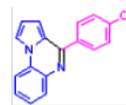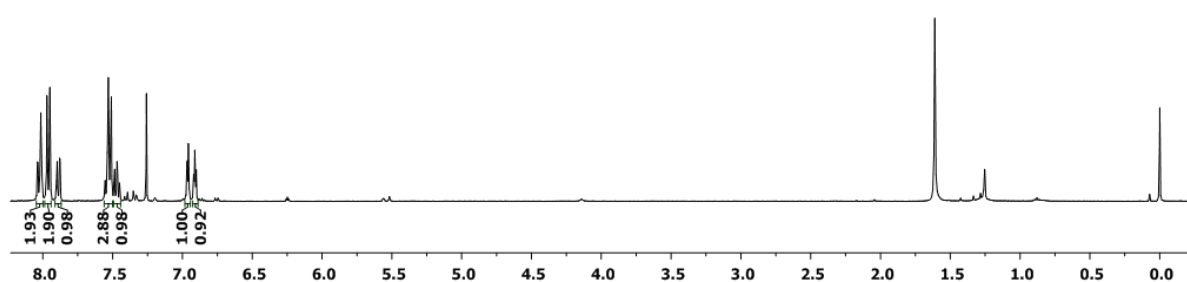

<sup>1</sup>H NMR spectrum of compound **6c**

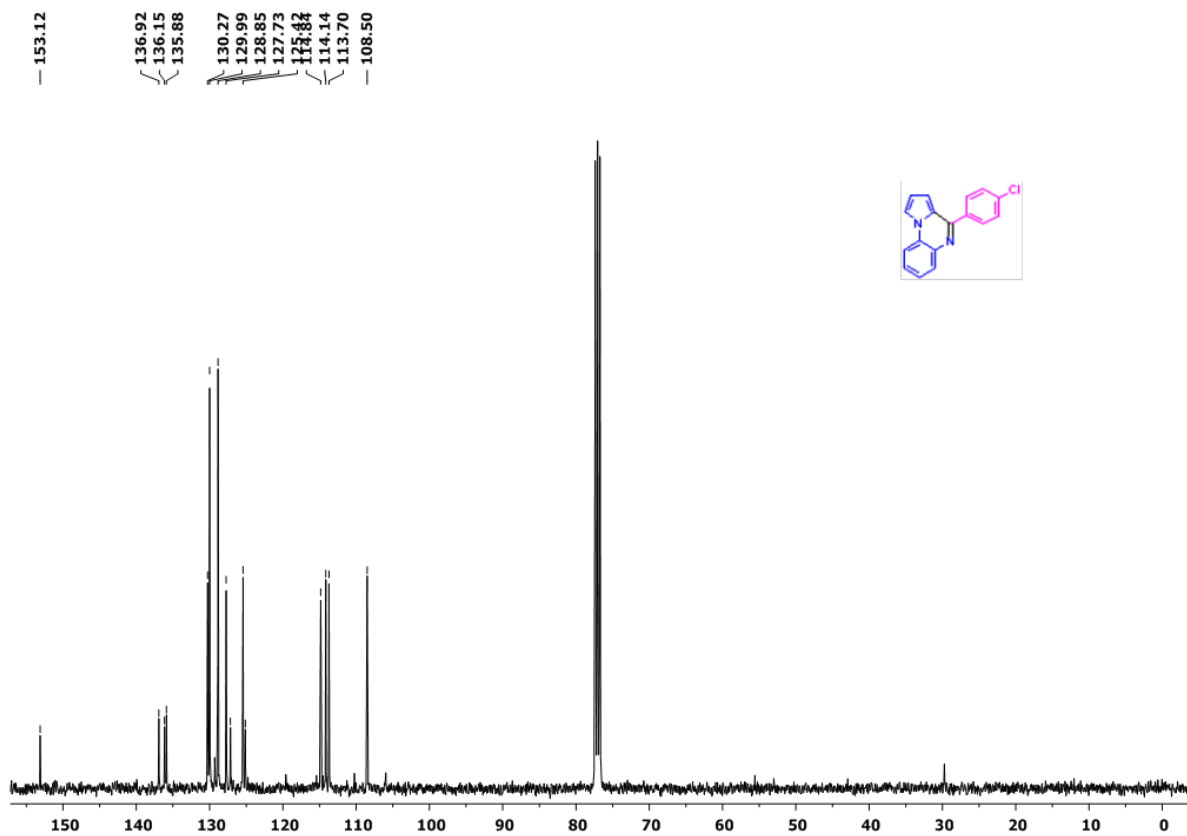

<sup>13</sup>C NMR spectrum of compound **6c**



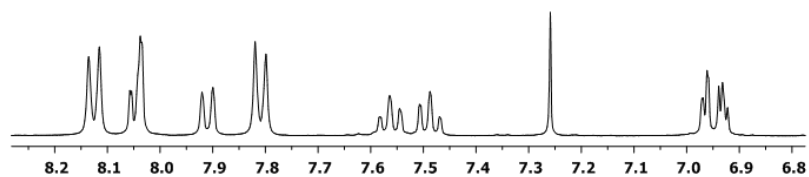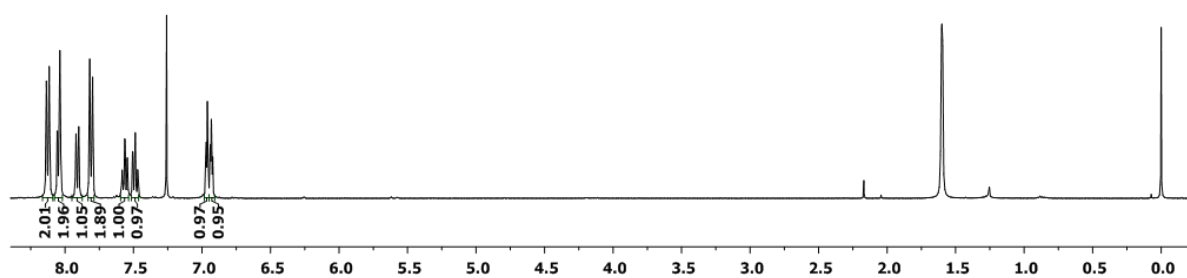

$^1\text{H}$  NMR spectrum of compound **6d**

— 152.88  
 — 141.88  
 — 136.09  
 — 130.42  
 — 129.04  
 — 128.03  
 — 126.18  
 — 125.61  
 — 125.51  
 — 117.97  
 — 114.28  
 — 113.75  
 — 108.44

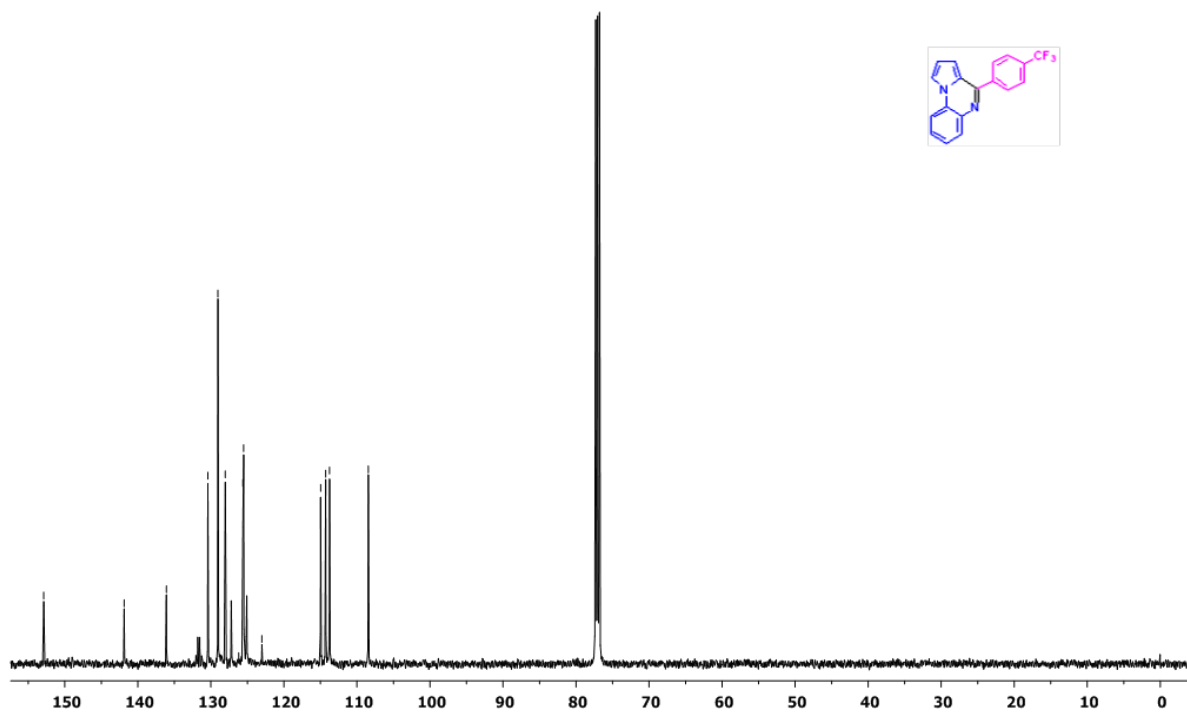

$^{13}\text{C}$  NMR spectrum of compound **6d**

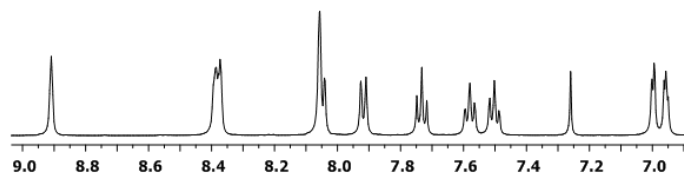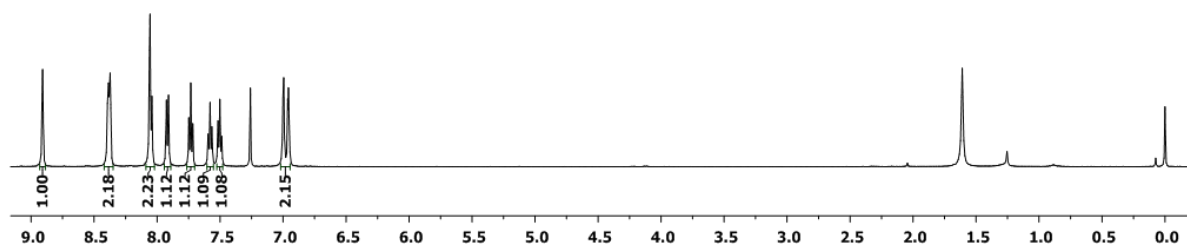

$^1\text{H}$  NMR spectrum of compound **6e**

Chemical structure of compound **6e** is shown in the top right corner: O=[N+]([O-])c1ccc(cc1)C2=NC3=CC=CC=C3N=C2

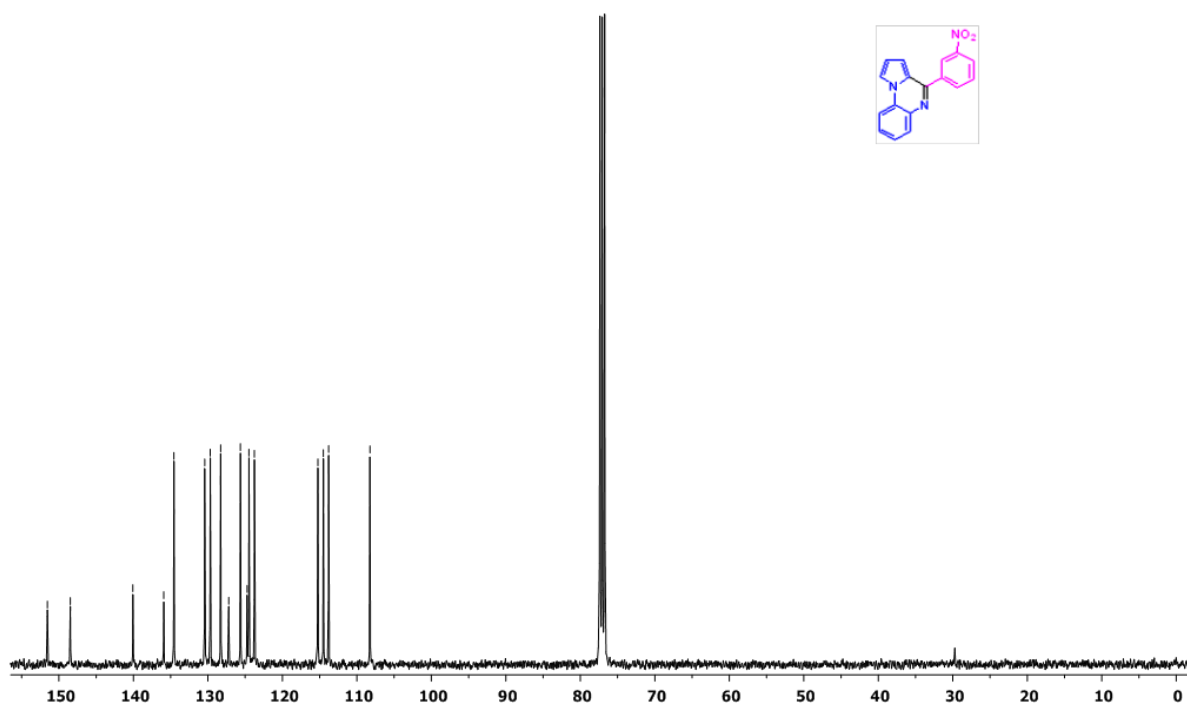

$^{13}\text{C}$  NMR spectrum of compound **6e**

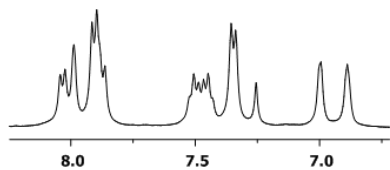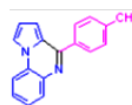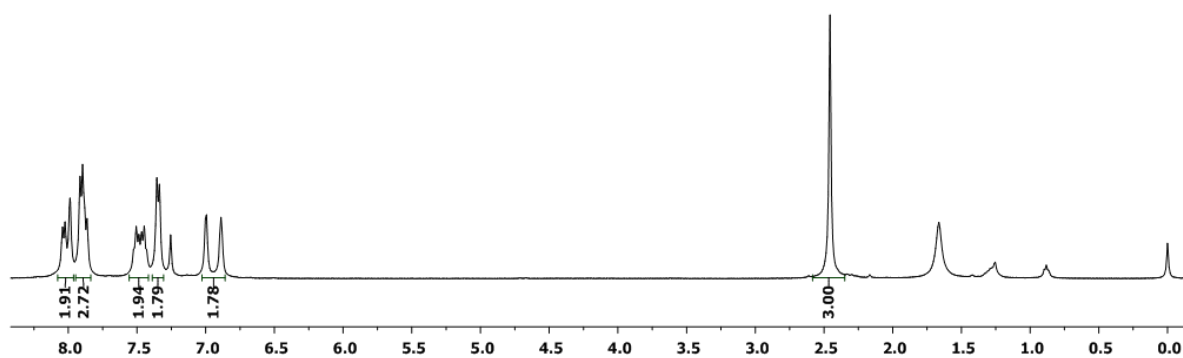

$^1\text{H}$  NMR spectrum of compound **6f**

— 154.41  
 — 139.92  
 — 136.34  
 — 135.71  
 — 130.19  
 — 129.29  
 — 128.58  
 — 127.32  
 — 127.17  
 — 118.53  
 — 118.53  
 — 113.92  
 — 113.63  
 — 108.71

— 21.37

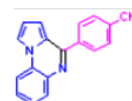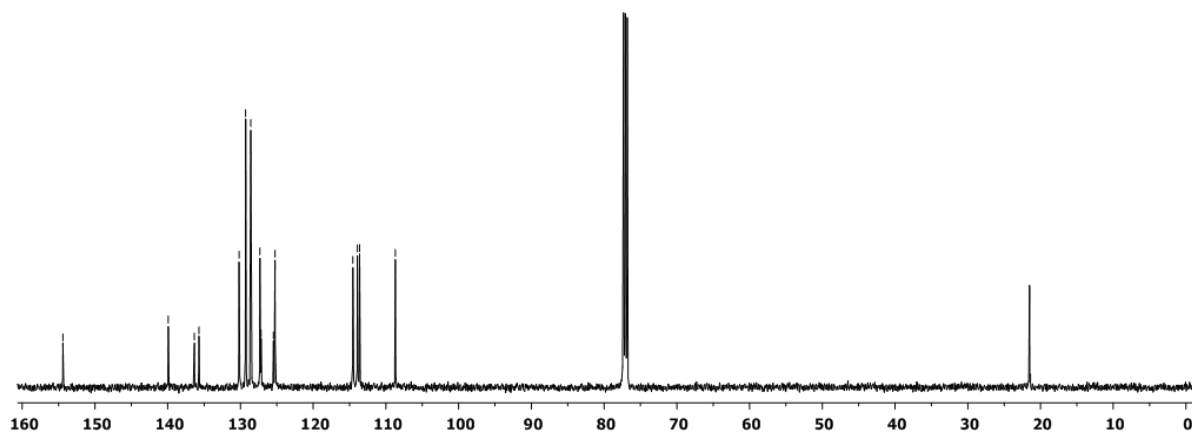

$^{13}\text{C}$  NMR spectrum of compound **6f**

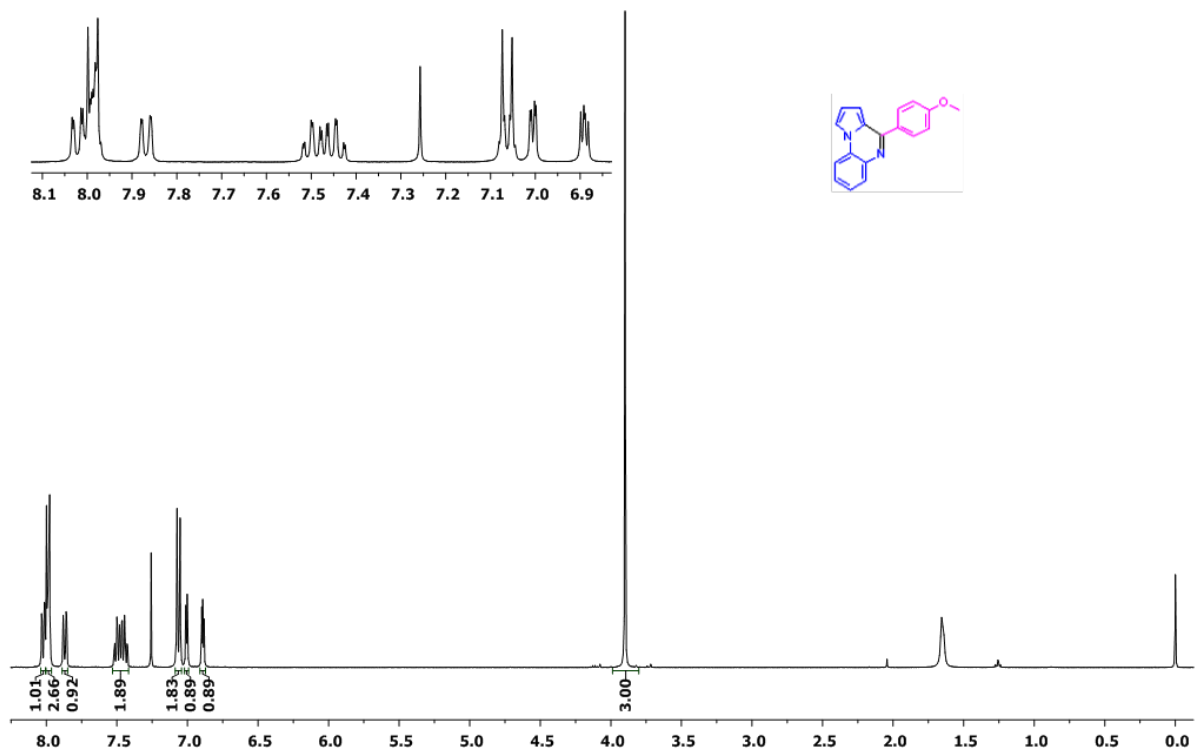

$^1\text{H NMR}$  spectrum of compound **6g**

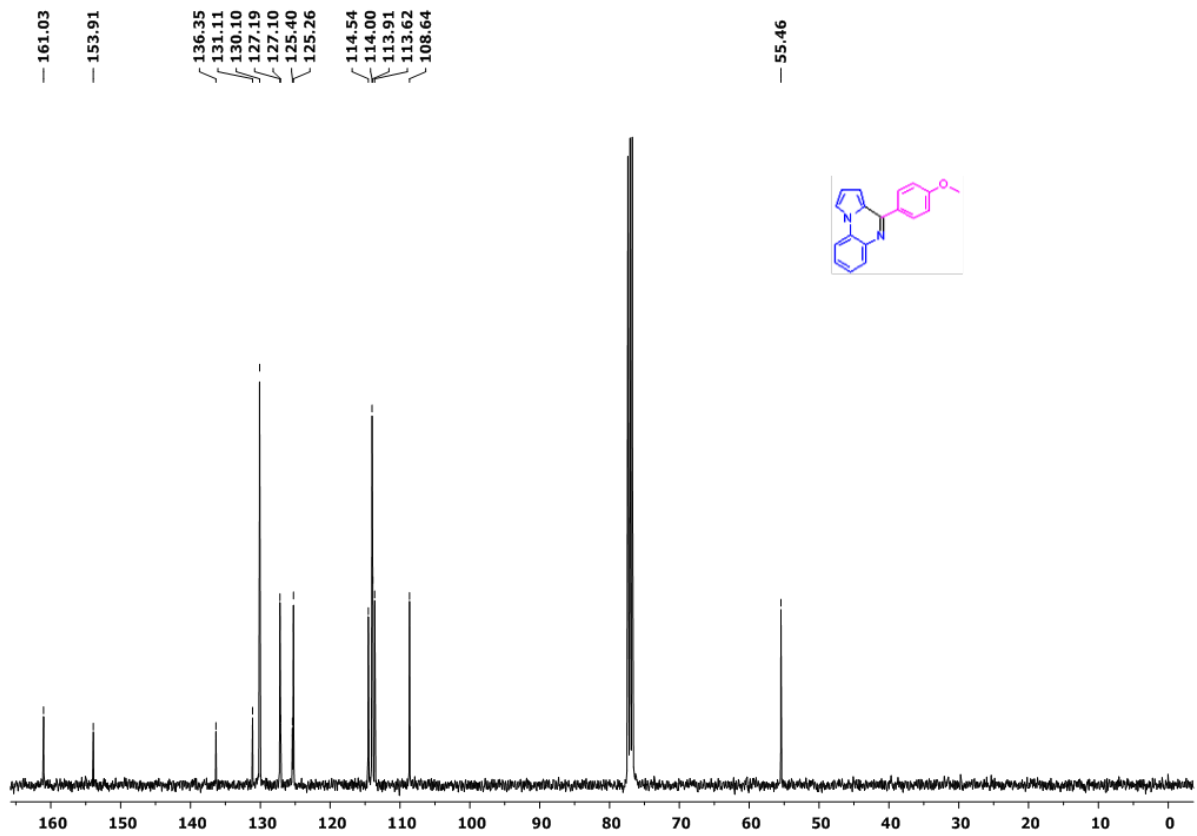

$^{13}\text{C NMR}$  spectrum of compound **6g**

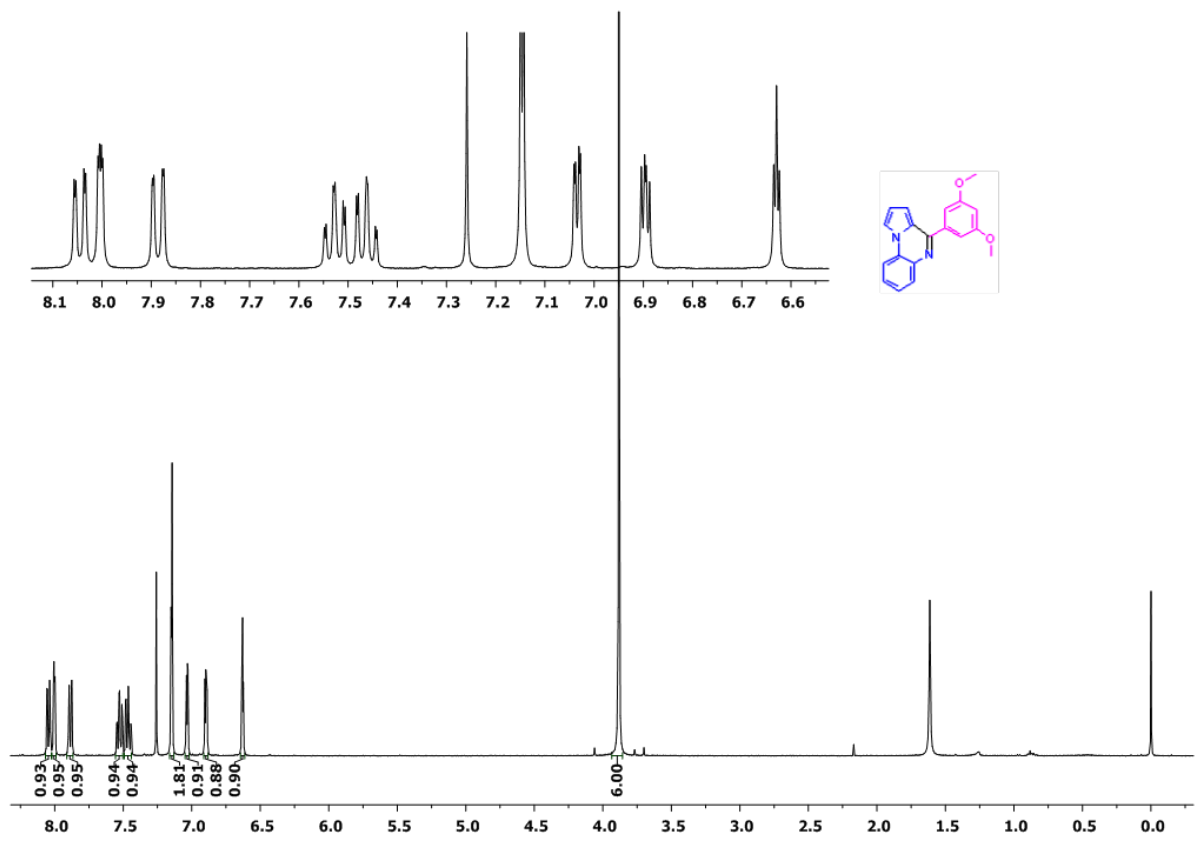

<sup>1</sup>H NMR spectrum of compound **6h**

Chemical shift values (ppm) for the <sup>13</sup>C NMR spectrum of compound **6h**:

|        |        |        |        |        |        |        |        |        |        |        |        |        |        |       |
|--------|--------|--------|--------|--------|--------|--------|--------|--------|--------|--------|--------|--------|--------|-------|
| 160.64 | 154.23 | 140.20 | 136.13 | 130.28 | 127.59 | 127.24 | 125.32 | 114.71 | 114.01 | 113.65 | 108.82 | 106.70 | 102.30 | 55.60 |
|--------|--------|--------|--------|--------|--------|--------|--------|--------|--------|--------|--------|--------|--------|-------|

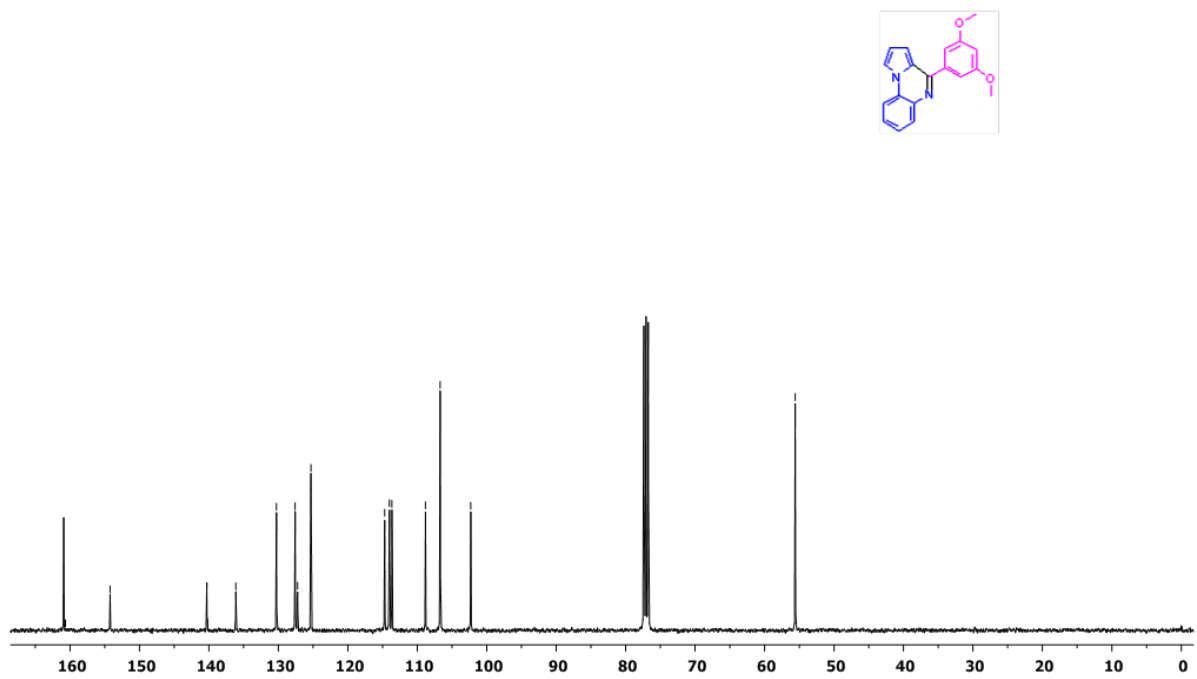

<sup>13</sup>C NMR spectrum of compound **6h**

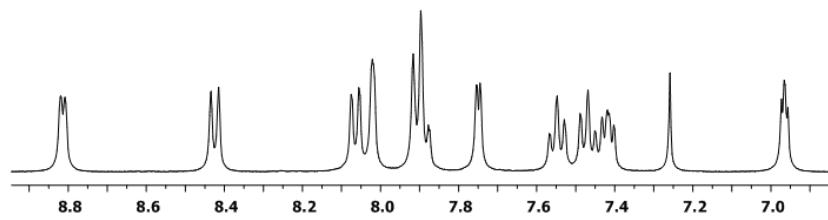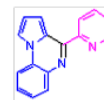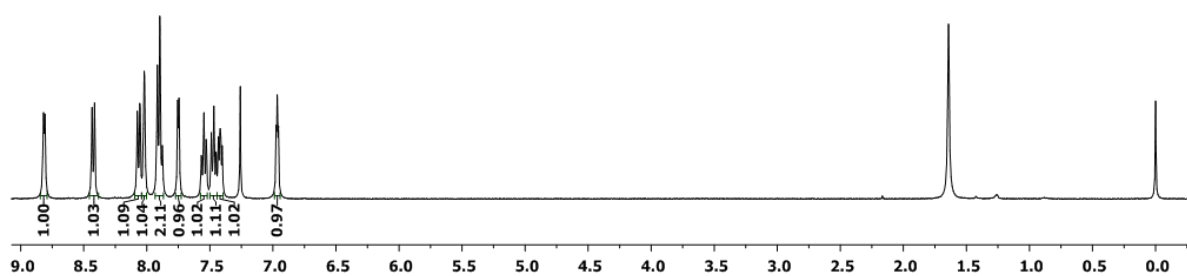

$^1\text{H}$  NMR spectrum of compound **6i**

— 156.49  
 — 151.32  
 — 148.93  
 — 136.70  
 — 135.79  
 — 130.45  
 — 128.03  
 — 125.16  
 — 124.73  
 — 124.28  
 — 122.56  
 — 122.56  
 — 114.36  
 — 113.72  
 — 110.61

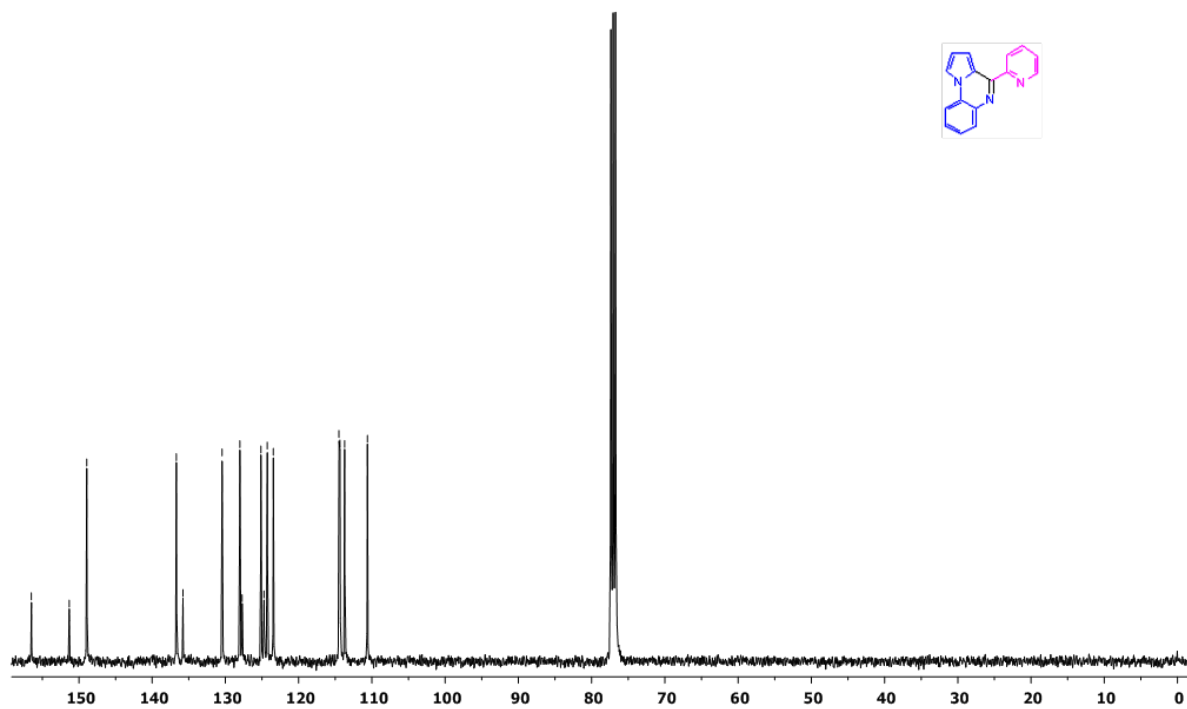

$^{13}\text{C}$  NMR spectrum of compound **6i**

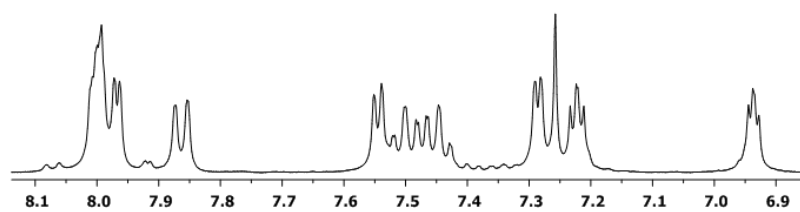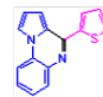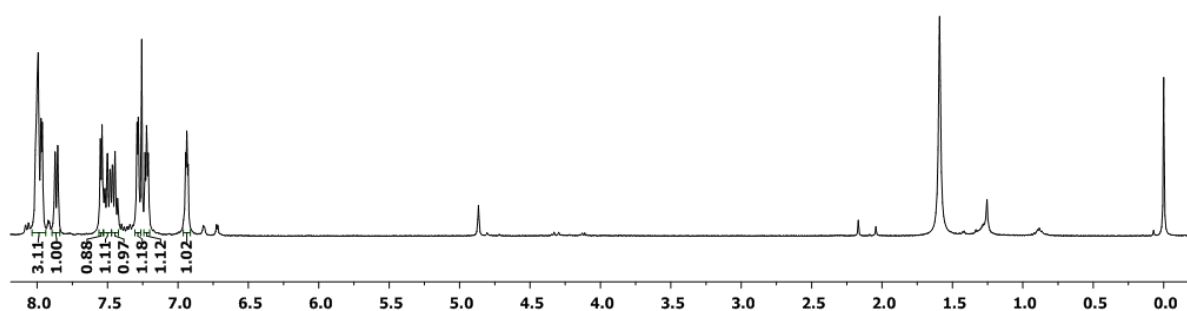

<sup>1</sup>H NMR spectrum of compound **6j**

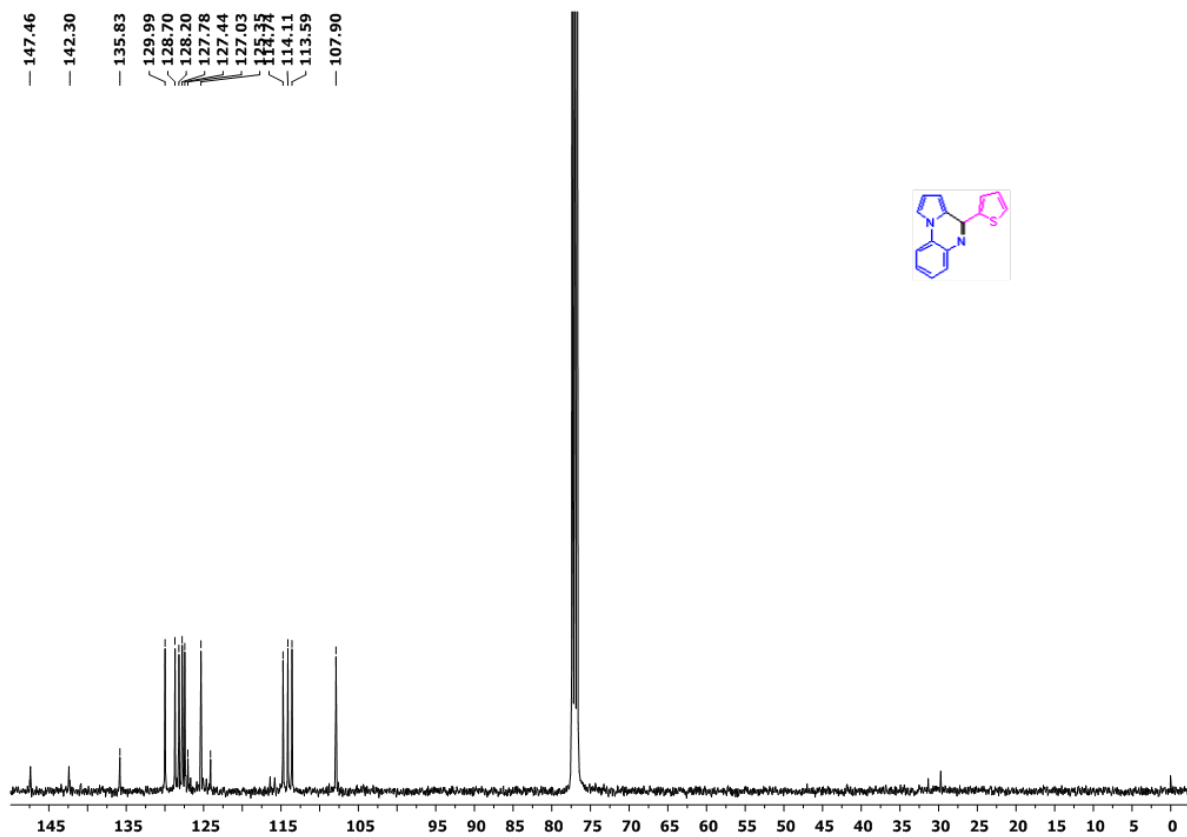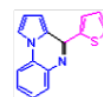

<sup>13</sup>C NMR spectrum of compound **6j**

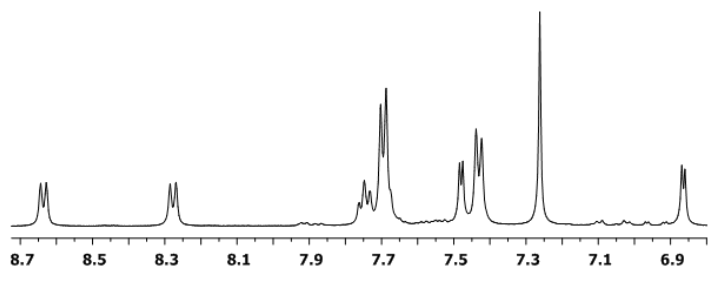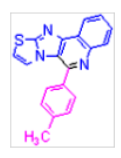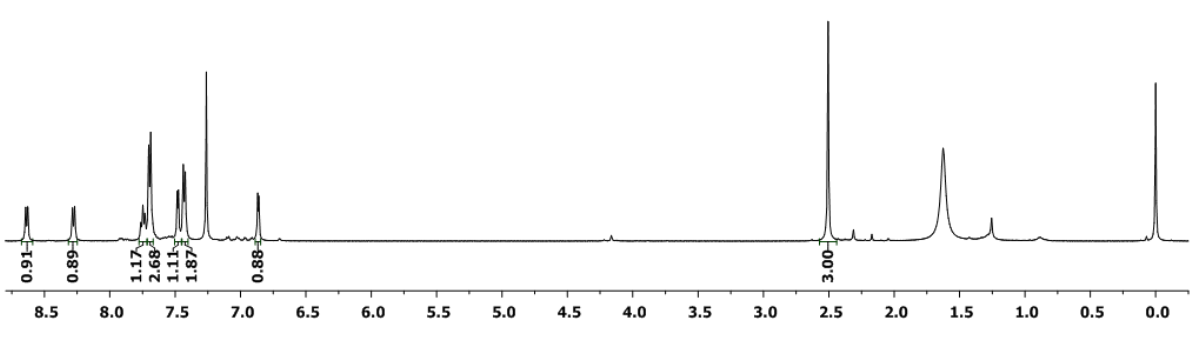

<sup>1</sup>H NMR spectrum of compound **8a**

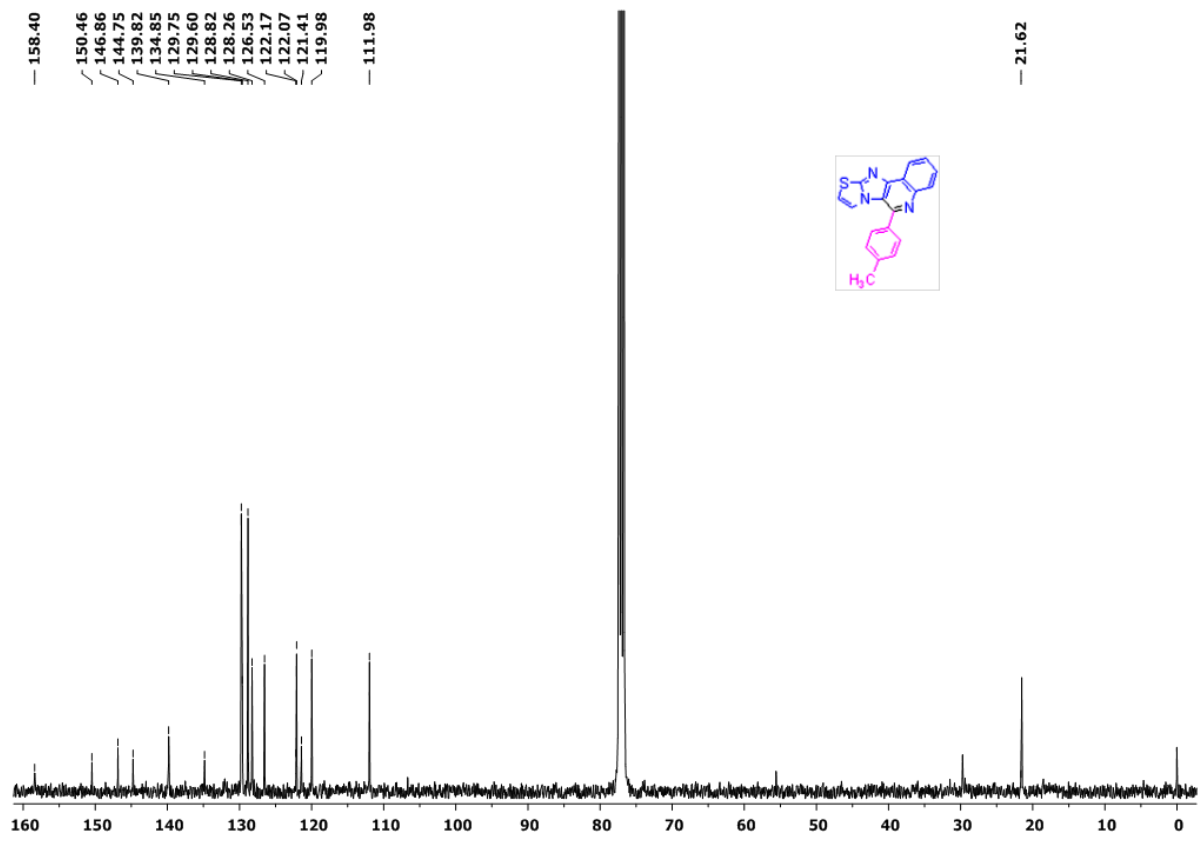

<sup>13</sup>C NMR spectrum of compound **8a**



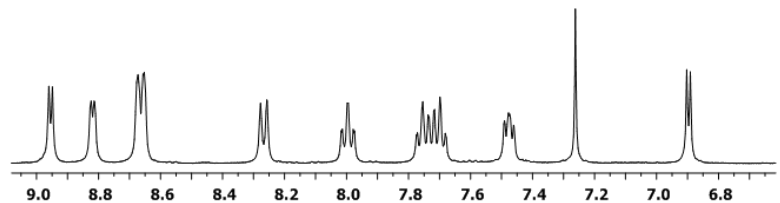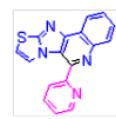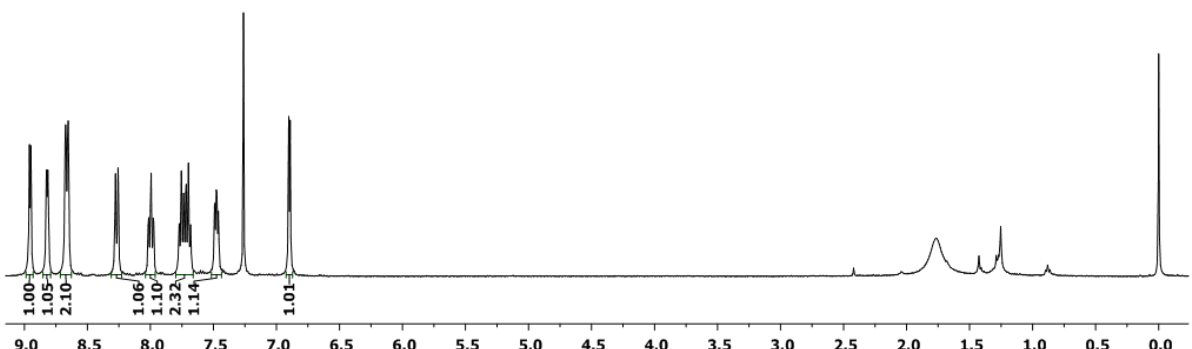

<sup>1</sup>H NMR spectrum of compound **8b**

- ~ 159.21
- ~ 156.61
- ~ 151.62
- ~ 147.99
- ~ 144.13
- ~ 143.98
- 137.57
- 129.54
- 128.24
- 127.01
- 125.12
- 124.39
- 122.30
- 122.24
- 122.02
- 109.86
- 77.38
- 77.06
- 76.74

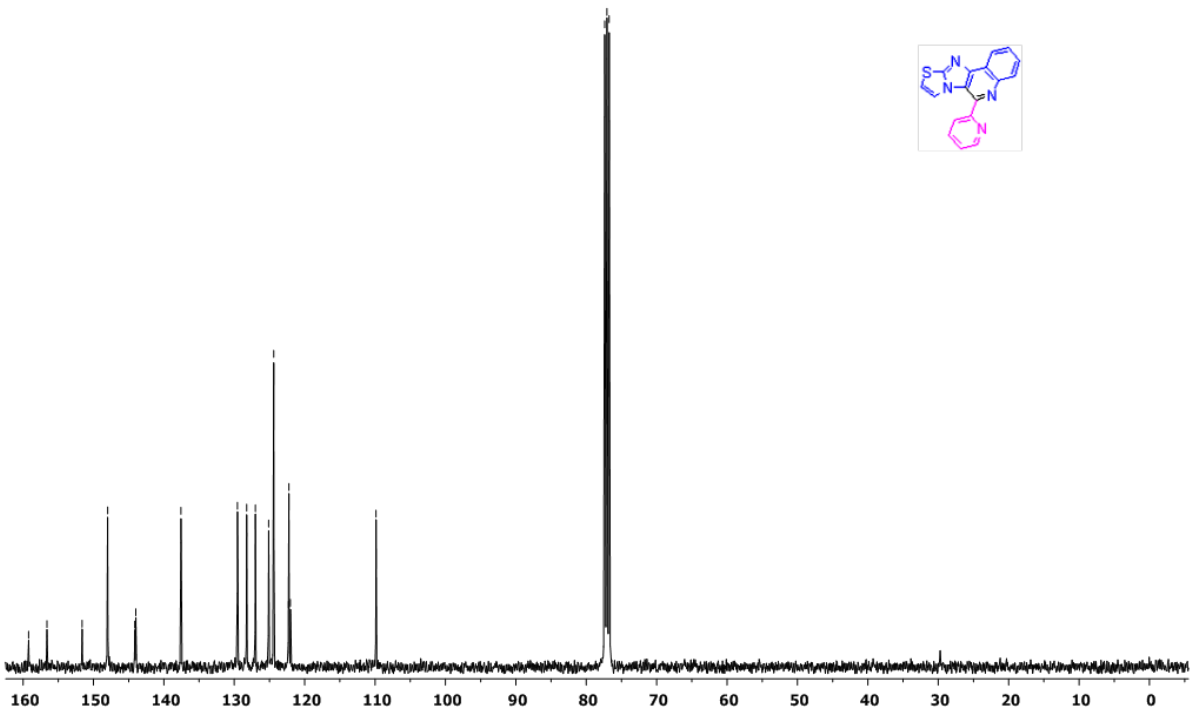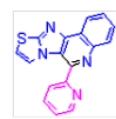

<sup>13</sup>C NMR spectrum of compound **8b**

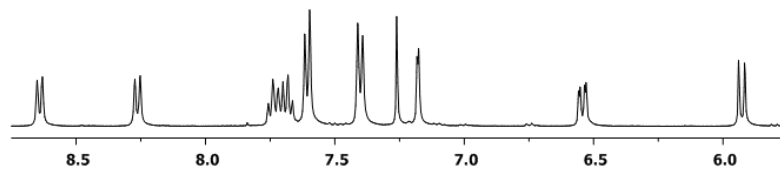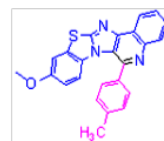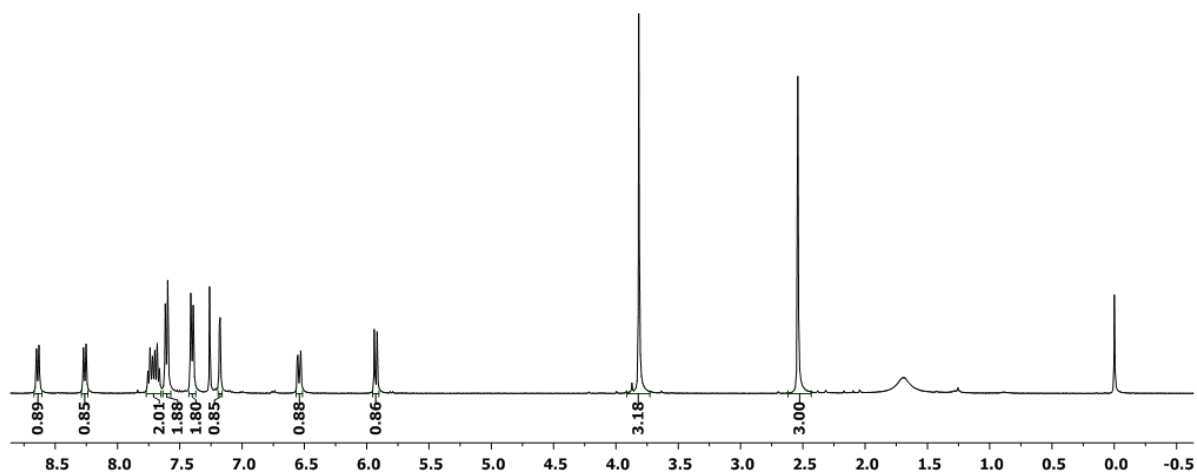

<sup>1</sup>H NMR spectrum of compound **8c**

157.24  
156.80  
150.16  
146.79  
144.14  
139.61  
137.70  
130.57  
129.58  
129.50  
129.33  
128.25  
127.41  
126.55  
124.23  
121.97  
120.88  
117.20  
112.84  
108.22

55.84

21.56

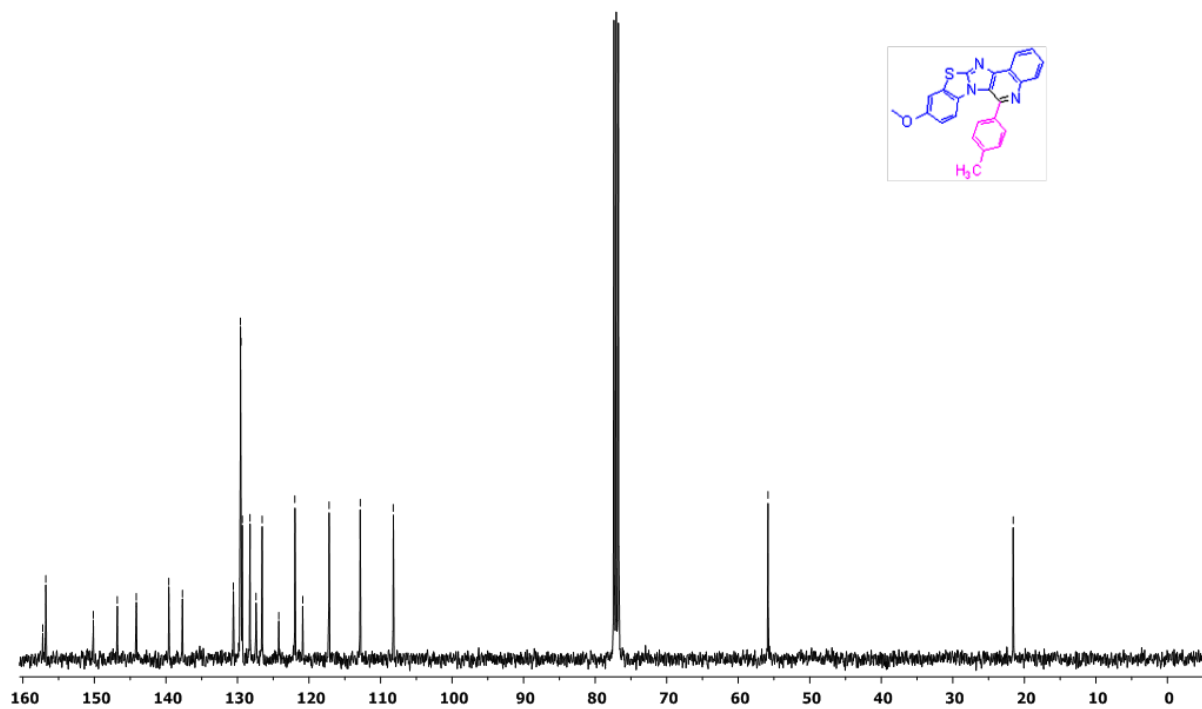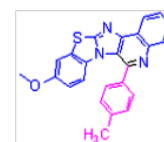

<sup>13</sup>C NMR spectrum of compound **8c**

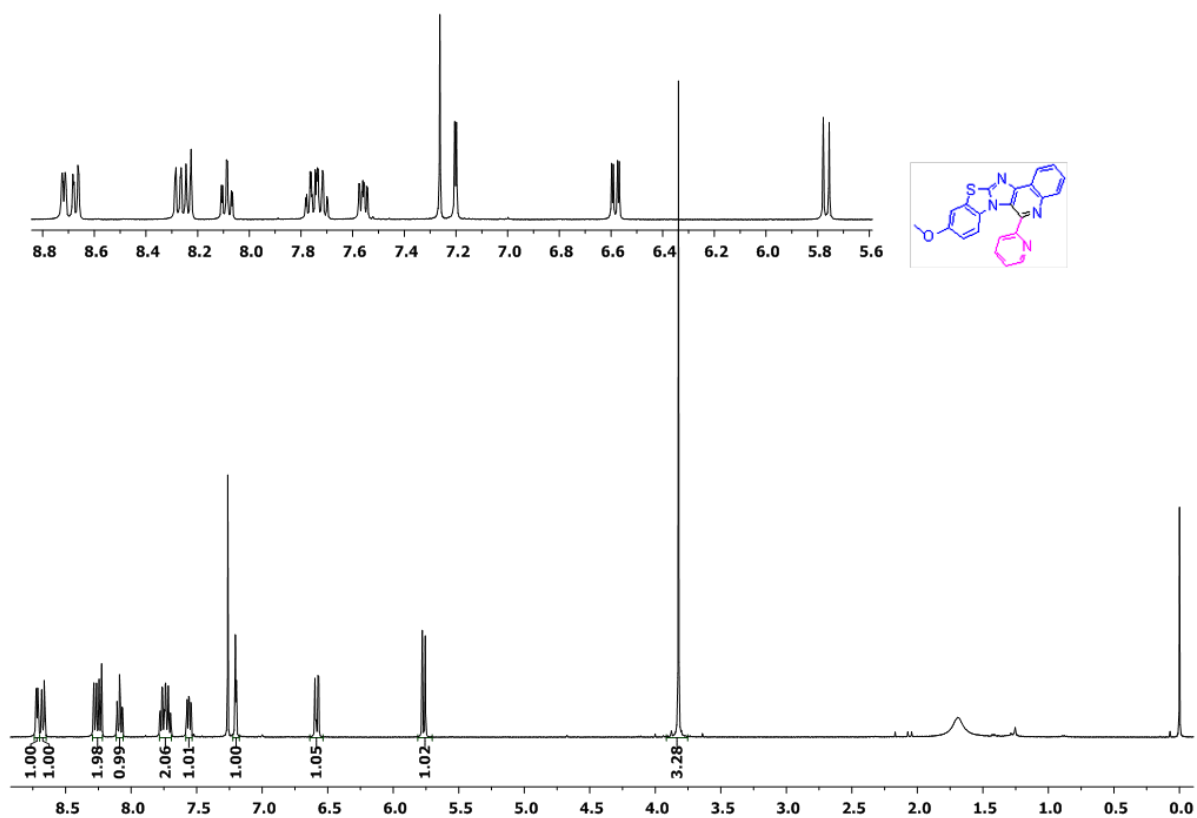

$^1\text{H}$  NMR spectrum of compound **8d**

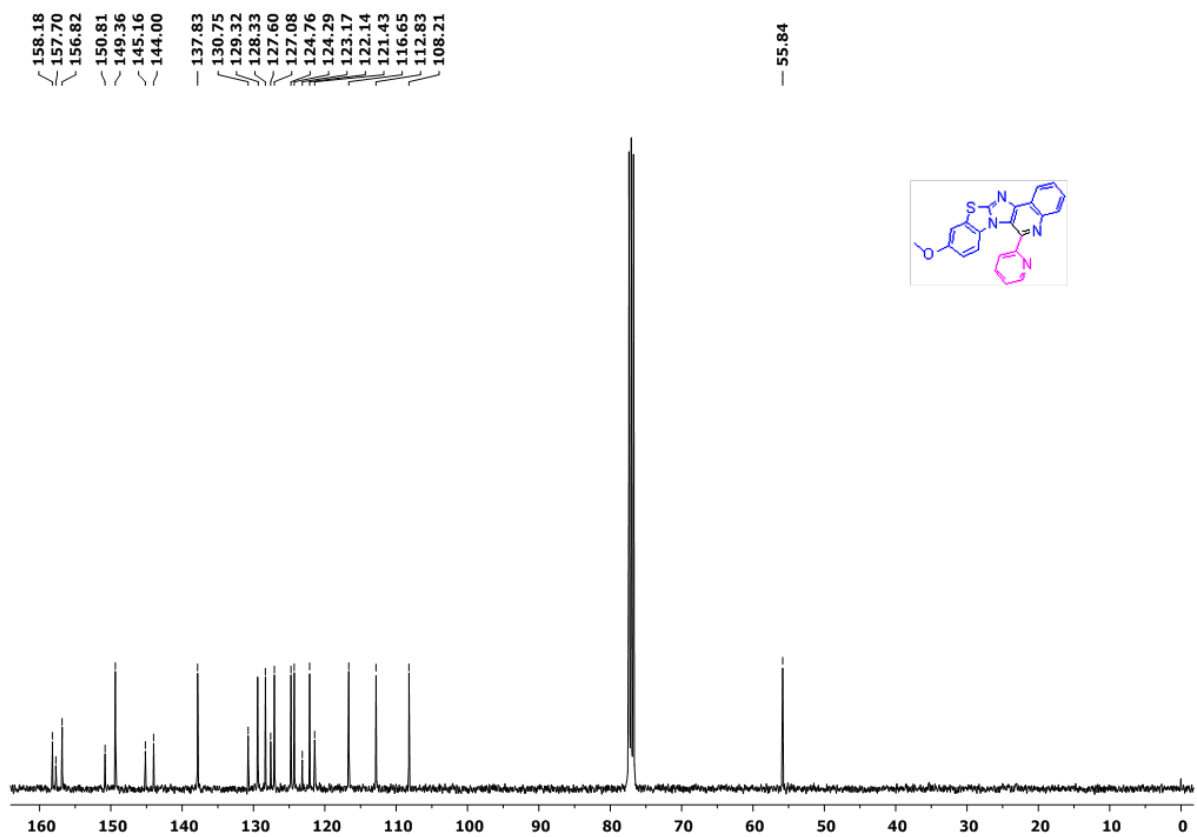

$^{13}\text{C}$  NMR spectrum of compound **8d**
